# Supplementary material for: Building a functional connectome of the Drosophila central complex
Source: eLife journal article supplement (doi:10.7554/elife.37017), 2018-08-20
Supplement: supp [file elife-37017-supp-v1.zip]

Archive with 17 entries (17 files):
- elife_poa_e37017_Figure_1_figure_supplement_1.pdf
- elife_poa_e37017_Figure_4_figure_supplement_2.pdf
- elife_poa_e37017_Figure_3_figure_supplement_2.pdf
- elife_poa_e37017_Figure_5_figure_supplement_1.pdf
- elife_poa_e37017_Figure_4_figure_supplement_1.pdf
- elife_poa_e37017_Figure_3_figure_supplement_1.png
- elife_poa_e37017_Transparent_Reporting_File.docx
- elife_poa_e37017_Figure_1_figure_supplement_2.pdf
- elife_poa_e37017_Figure_3_figure_supplement_3.pdf
- elife_poa_e37017_Figure_3_video_3.mp4
- elife_poa_e37017_Figure_4_figure_supplement_4.pdf
- elife_poa_e37017_Figure_4_figure_supplement_5.pdf
- elife_poa_e37017_Supplementary_File_1.csv
- elife_poa_e37017_Figure_4_figure_supplement_3.pdf
- elife_poa_e37017_Figure_3_video_1.mp4
- elife_poa_e37017_Figure_3_video_2.mp4
- elife_poa_e37017_Figure_3_figure_supplement_4.pdf
