# Supplementary material for: Building a functional connectome of the Drosophila central complex
Source: eLife journal article supplement (doi:10.7554/elife.37017), 2018-08-20
Supplement: supp [file elife-37017-supp-v1.zip › elife_poa_e37017_Figure_1_figure_supplement_1.pdf]

- Postsynaptic neuropile
- Presynaptic neuropile
- Mixed neuropile

## EB columnar

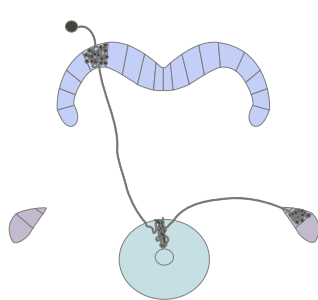

E-PG

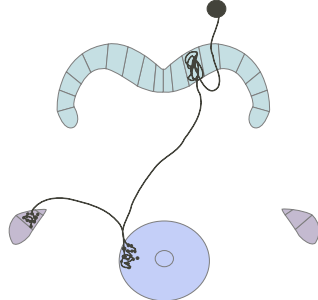

P-EG

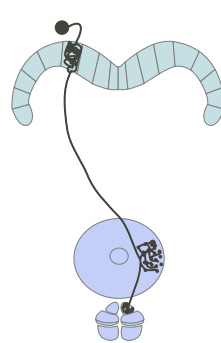

PEN-1

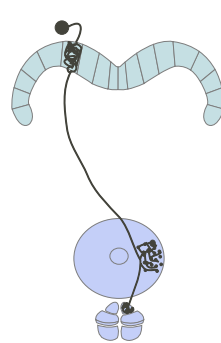

PEN-2

## FB columnar

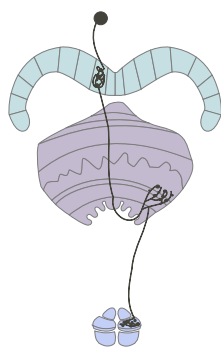

P-F3N2d

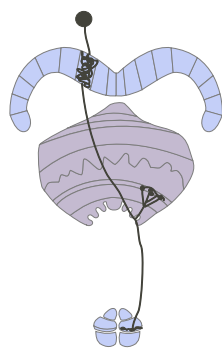

P-F3N2v

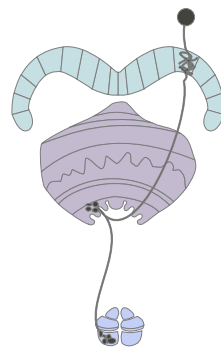

P-F1N3

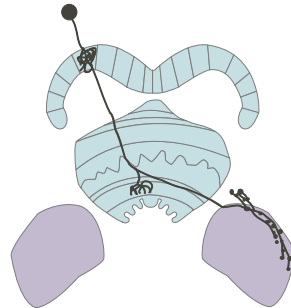

PF-LCRe

## Ring neurons

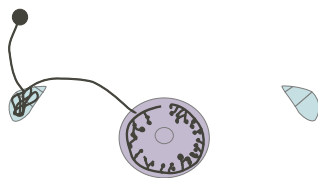

G-Eo

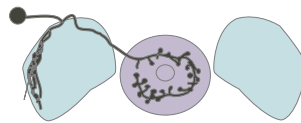

L-Em

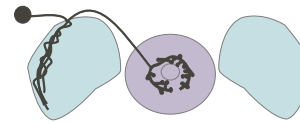

L-Ei

## PB inputs and interneurons

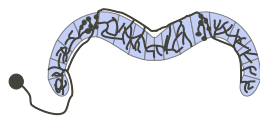

$\Delta 7$

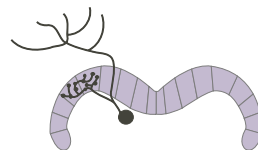

IS-P

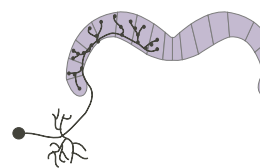

S-P

## LAL-Noduli neurons

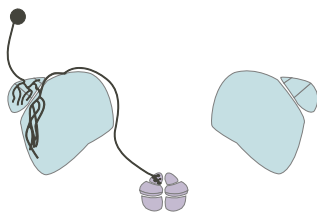

GL-N1

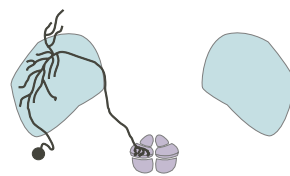

CreL-N2

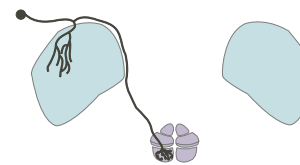

L-N3

## Others

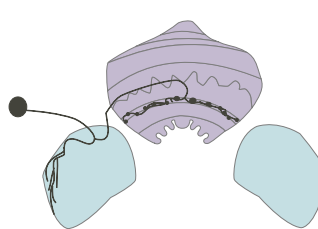

IMPL-F

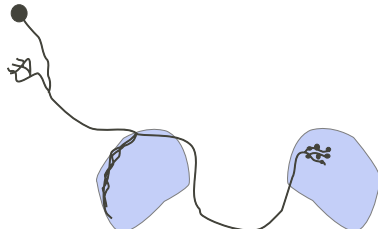

SMPL-L

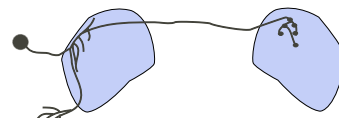

WL-L

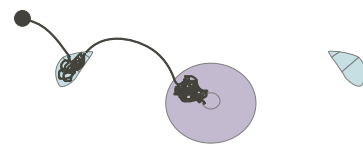

AMPG-E
