# Supplementary material for: Building a functional connectome of the Drosophila central complex
Source: eLife journal article supplement (doi:10.7554/elife.37017), 2018-08-20

I Overall connectivity diagram as suggested by light microscopy anatomy

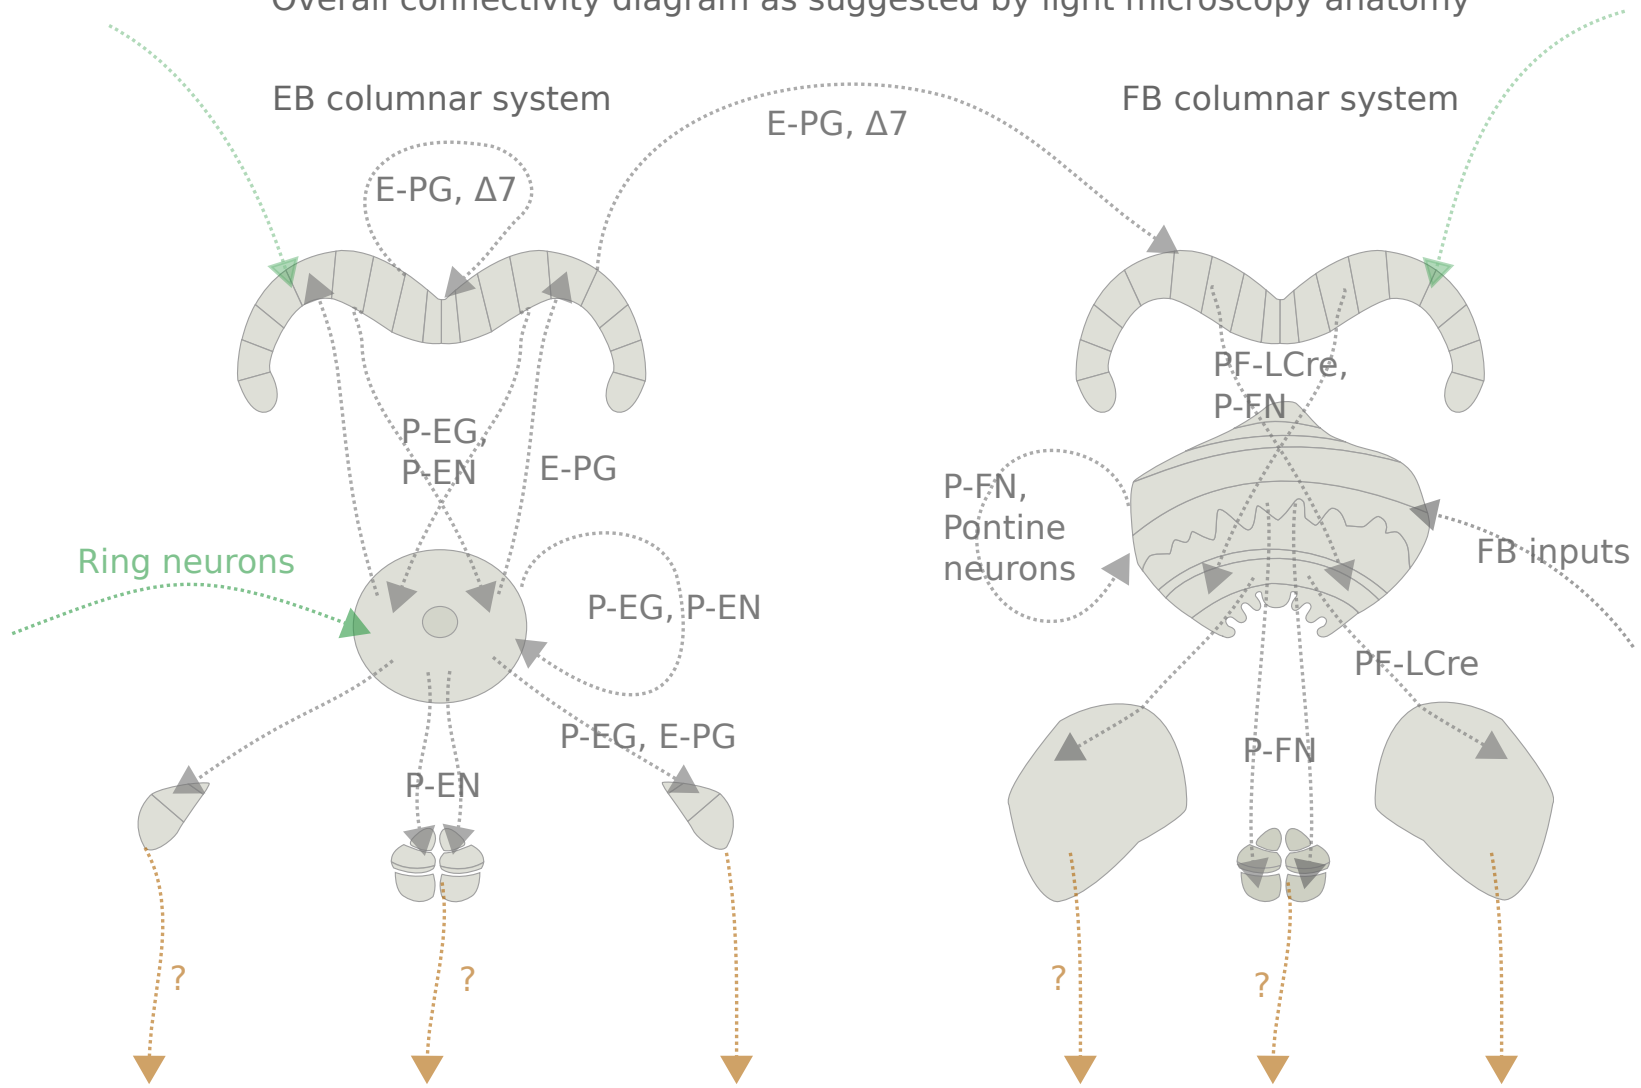

Suggested by anatomy .....▶

Not tested ———

Inputs ———

Outputs ———

Excitation ▶

Inhibition —●—

Sparse connectivity through interneurons - - -

ii

Overall connectivity diagram updated with functional connectivity

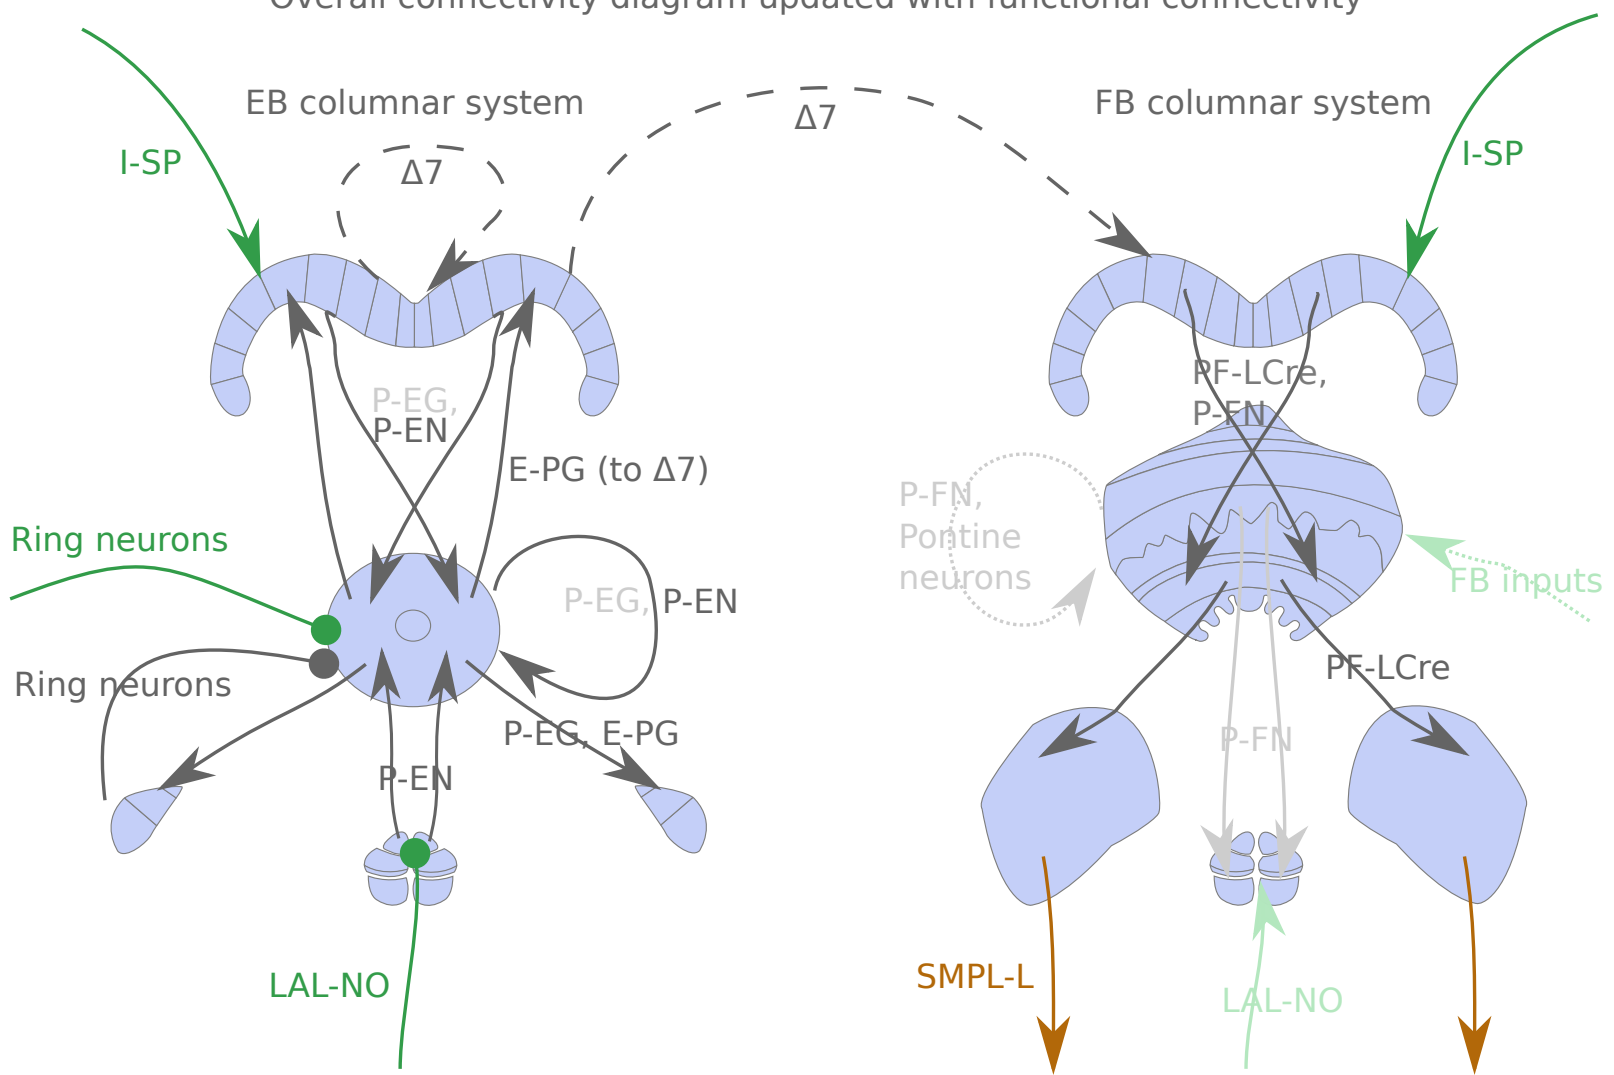

Supplement: supp [file elife-37017-supp-v1.zip › elife_poa_e37017_Figure_1_figure_supplement_2.pdf]
