# Supplementary material for: Building a functional connectome of the Drosophila central complex
Source: eLife journal article supplement (doi:10.7554/elife.37017), 2018-08-20
Supplement: supp [file elife-37017-supp-v1.zip › elife_poa_e37017_Figure_3_figure_supplement_2.pdf]

SMPL-L to WL-L

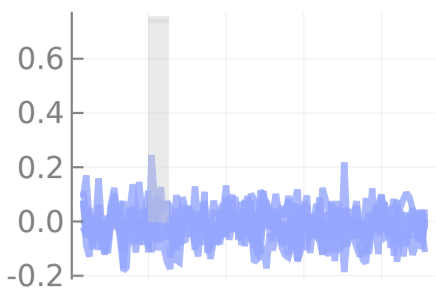

E-PG to IS-P

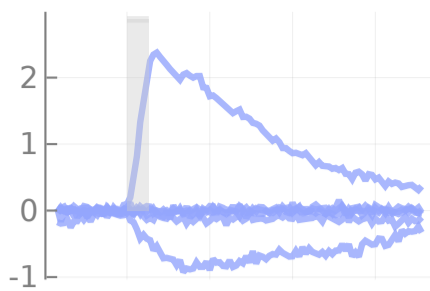

GL-N1 to P-F3N2v

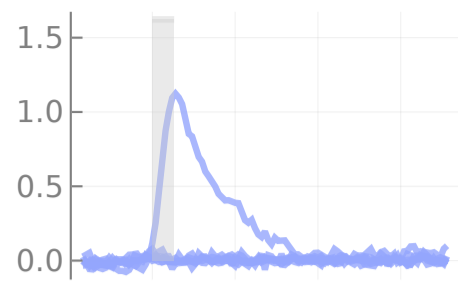

GL-N1 to L-Ei

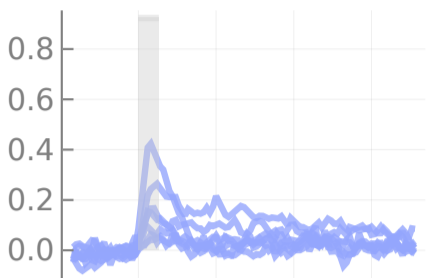

E-PG to L-Cre

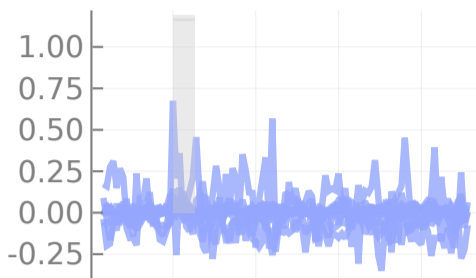

IMPL-F to PF-LCRe

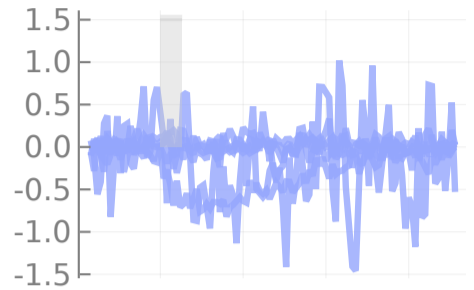

P-EN1 to GL-N1

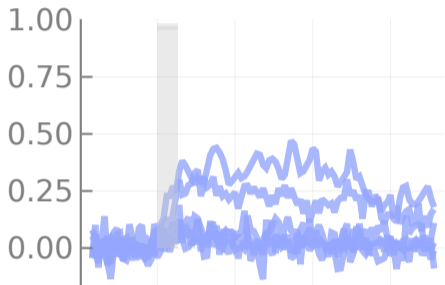

L-Ei to L-N3

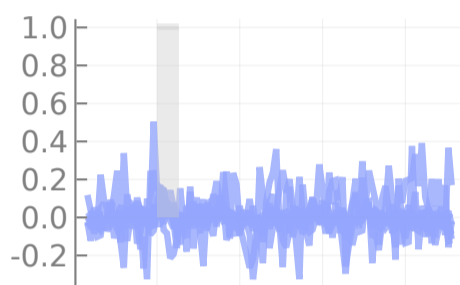 $\Delta 7$  to IS-P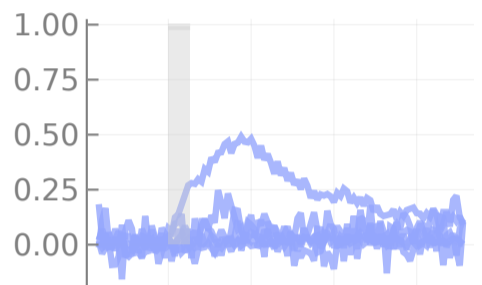

SMPL-L to L-Cre

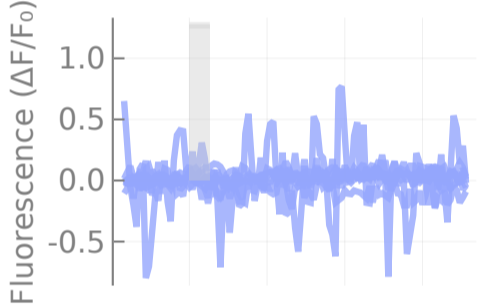

SMPL-L to GL-N1

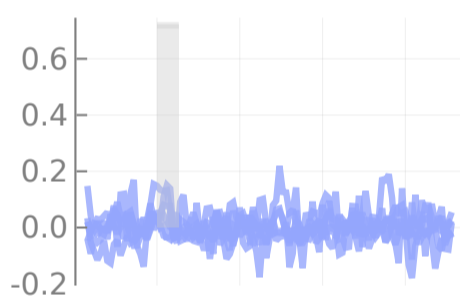

P-F3N2d to PF-LCRe

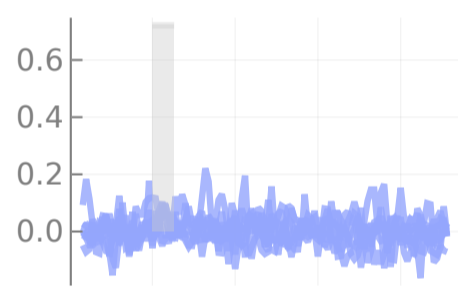

GL-N1 to P-F1N3

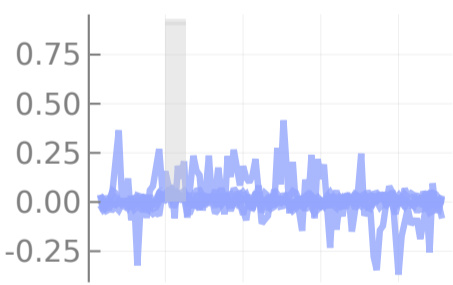

L-N3 to WL-L

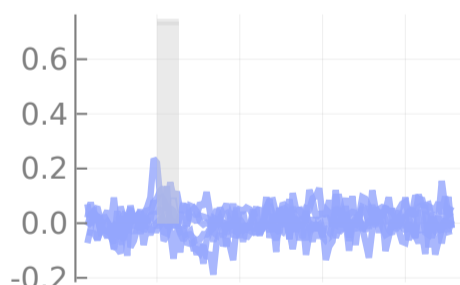

P-F1N3 to GL-N1

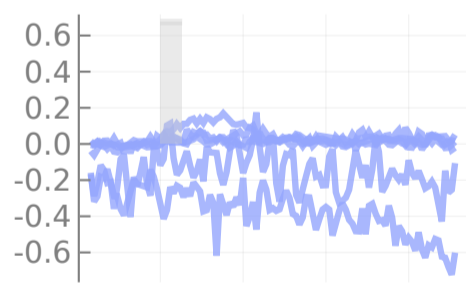

GL-N1 to L-Em

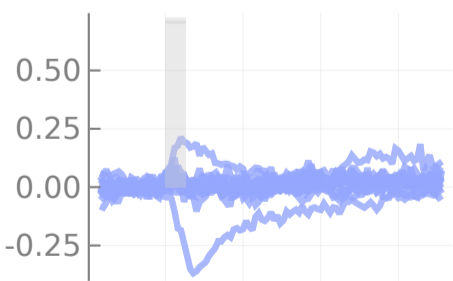

GL-N1 to P-F3N2d

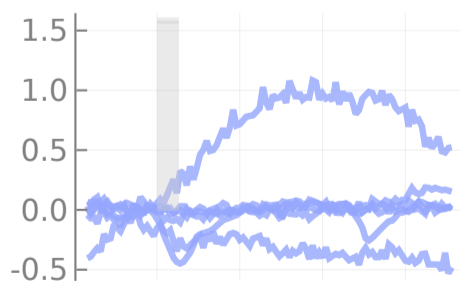

L-N3 to IMPL-F

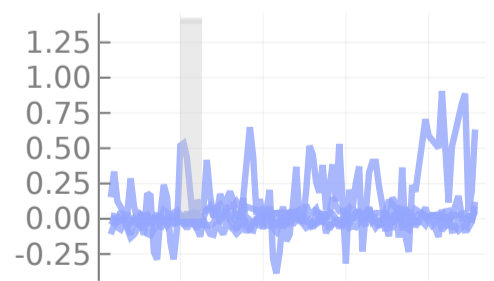

P-F1N3 to PF-LCRe

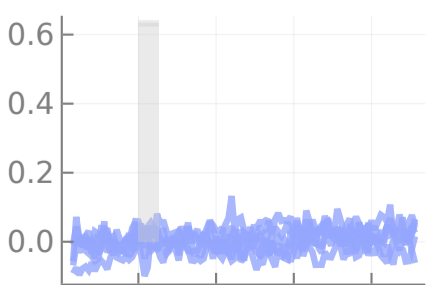

L-Ei to SMPL-L

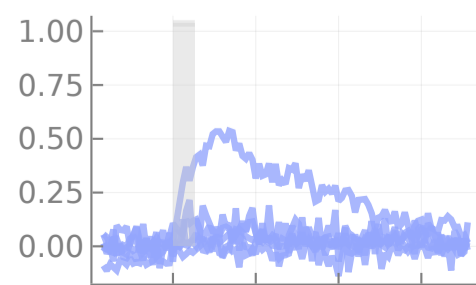

E-PG to EFBG

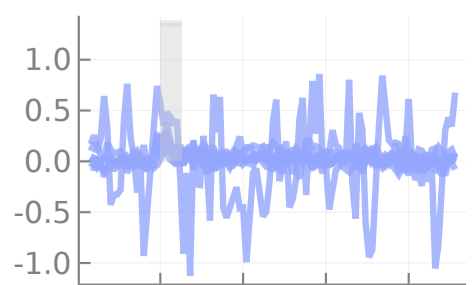Fluorescence ( $\Delta F/F_0$ )

Time (s)

Time (s)

Time (s)
