# Supplementary material for: Building a functional connectome of the Drosophila central complex
Source: eLife journal article supplement (doi:10.7554/elife.37017), 2018-08-20

Normalized integral (s)

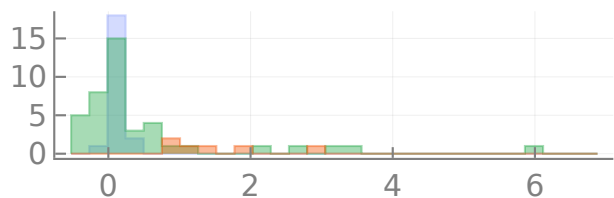

Scaled normalized integral

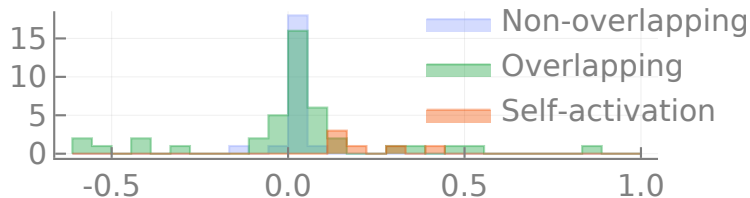

Normalized peak

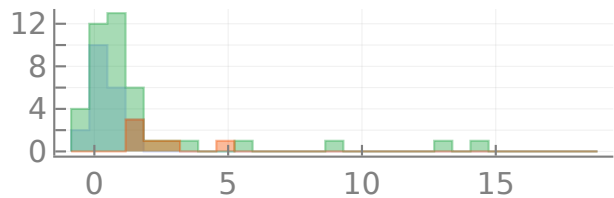

Peak fluorescence ( $\Delta F/F_0$ )

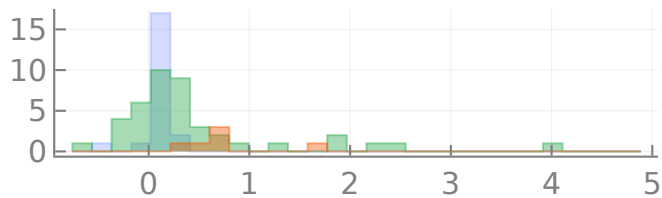

Integral ( $\Delta F/F_0$ ) (s)

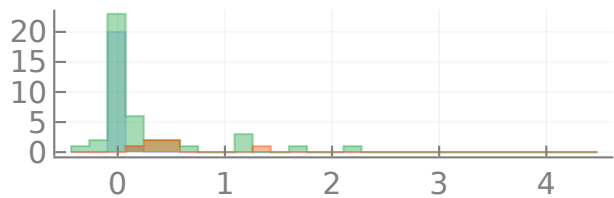

Decay half time (s)

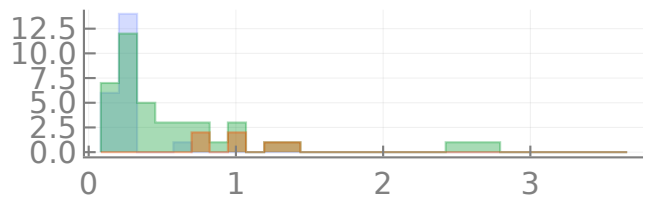

Rise time (s)

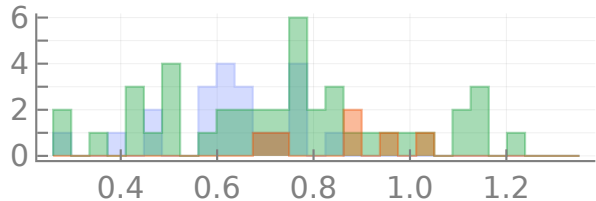

Repeat to repeat correlations

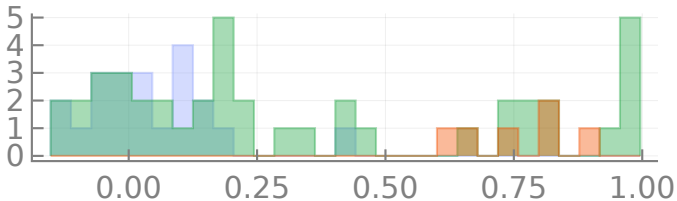

Correlations between experiments

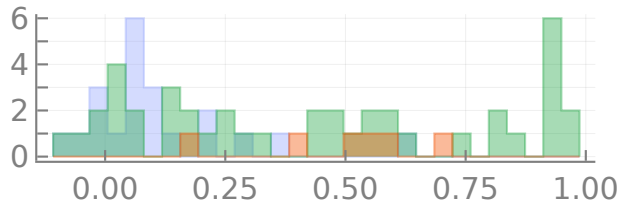

Integral to baseline correlation

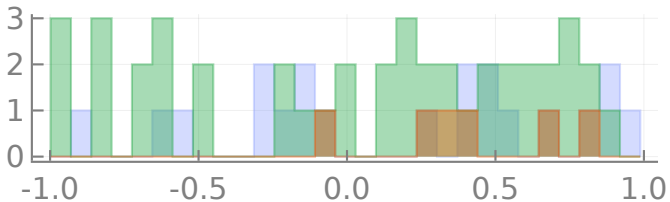

Supplement: supp [file elife-37017-supp-v1.zip › elife_poa_e37017_Figure_3_figure_supplement_3.pdf]
