# Supplementary material for: Building a functional connectome of the Drosophila central complex
Source: eLife journal article supplement (doi:10.7554/elife.37017), 2018-08-20
Supplement: supp [file elife-37017-supp-v1.zip › elife_poa_e37017_Supplementary_File_1.csv]

Cell_Pair	genotype	region_imaged	data_folder	stack_number
Cre.s-LAL.s-NO2.b-to-PBG2-9.s-FBl3.b-NO2V.b	67D09-VK22LexA-SS04420Gal4-Chrimson-in-Gal4	FB	jun2817	10
Cre.s-LAL.s-NO2.b-to-PBG2-9.s-FBl3.b-NO2V.b	67D09-VK22LexA-SS04420Gal4-Chrimson-in-Gal4	FB	jun2817	9
Cre.s-LAL.s-NO2.b-to-PBG2-9.s-FBl3.b-NO2V.b	67D09-VK22LexA-SS04420Gal4-Chrimson-in-Gal4	FB	jun2817	8
Cre.s-LAL.s-NO2.b-to-PBG2-9.s-FBl3.b-NO2V.b	67D09-VK22LexA-SS04420Gal4-Chrimson-in-Gal4	FB	jun2817	7
Cre.s-LAL.s-NO2.b-to-PBG2-9.s-FBl3.b-NO2V.b	67D09-VK22LexA-SS04420Gal4-Chrimson-in-Gal4	FB	jun2817	4
Cre.s-LAL.s-NO2.b-to-PBG2-9.s-FBl3.b-NO2V.b	67D09-VK22LexA-SS04420Gal4-Chrimson-in-Gal4	FB	jun2817	3
EB.w-AMP.d-D_GAsurround-to-PBG1-8.b-EBw.s-DV_GA.b	60D05LexA-17H12Gal4-Chrimson-in-Gal4	EB	jan0816	2
EB.w-AMP.d-D_GAsurround-to-PBG1-8.b-EBw.s-DV_GA.b	60D05LexA-17H12Gal4-Chrimson-in-Gal4	EB	jan1816	3
EB.w-AMP.d-D_GAsurround-to-PBG1-8.b-EBw.s-DV_GA.b	60D05LexA-17H12Gal4-Chrimson-in-Gal4	EB	jan1916	4
EB.w-AMP.d-D_GAsurround-to-PBG1-8.b-EBw.s-DV_GA.b	60D05LexA-17H12Gal4-Chrimson-in-Gal4	EB	jan1916	3
EB.w-AMP.d-D_GAsurround-to-PBG1-8.b-EBw.s-DV_GA.b	60D05LexA-17H12Gal4-Chrimson-in-Gal4	EB	nov1915	3
EB.w-AMP.d-D_GAsurround-to-PBG1-8.b-EBw.s-DV_GA.b	60D05LexA-17H12Gal4-Chrimson-in-Gal4	EB	nov1915	1
EBIRP I-O-LAL.s-to-LAL.s-NO3Ai.b	12G04LexA-75H04Gal4-Chrimson-in-Gal4	NO	jul1316	4
EBIRP I-O-LAL.s-to-LAL.s-NO3Ai.b	12G04LexA-75H04Gal4-Chrimson-in-Gal4	NO	jul1316	3
EBIRP I-O-LAL.s-to-LAL.s-NO3Ai.b	12G04LexA-75H04Gal4-Chrimson-in-Gal4	LAL	jul1416	3
EBIRP I-O-LAL.s-to-LAL.s-NO3Ai.b	12G04LexA-75H04Gal4-Chrimson-in-Gal4	LAL	jul1516
EBIRP I-O-LAL.s-to-LAL.s-NO3Ai.b	12G04LexA-75H04Gal4-Chrimson-in-Gal4	NO	jul1516	2
EBIRP I-O-LAL.s-to-LAL.s-NO3Ai.b	12G04LexA-75H04Gal4-Chrimson-in-Gal4	LAL	jul1516	1
EBIRP I-O-LAL.s-to-LAL.s-NO3Ai.b	12G04LexA-75H04Gal4-Chrimson-in-Gal4	LAL	jul1816	3
EBIRP I-O-LAL.s-to-PBG1-8.b-EBw.s-DV_GA.b	60D05LexA-75H04Gal4-Chrimson-in-Gal4	EB-in	dec2415	3
EBIRP I-O-LAL.s-to-PBG1-8.b-EBw.s-DV_GA.b	60D05LexA-75H04Gal4-Chrimson-in-Gal4	EB-in	dec2415	2
EBIRP I-O-LAL.s-to-PBG1-8.b-EBw.s-DV_GA.b	60D05LexA-75H04Gal4-Chrimson-in-Gal4	EB-in	dec2915	3
EBIRP I-O-LAL.s-to-PBG1-8.b-EBw.s-DV_GA.b	60D05LexA-75H04Gal4-Chrimson-in-Gal4	EB-in	dec2915	2
EBIRP I-O-LAL.s-to-PBG1-8.b-EBw.s-DV_GA.b	60D05LexA-75H04Gal4-Chrimson-in-Gal4	EB-in	dec3015	2
EBIRP I-O-LAL.s-to-PBG1-8.b-EBw.s-DV_GA.b	60D05LexA-75H04Gal4-Chrimson-in-Gal4	EB-in	dec3015	1
EBIRP I-O-LAL.s-to-SMP.s-LAL.s-LAL.b.contra	72H06LexA-75H04Gal4-Chrimson-in-Gal4	LAL	feb1616	2
EBIRP I-O-LAL.s-to-SMP.s-LAL.s-LAL.b.contra	72H06LexA-75H04Gal4-Chrimson-in-Gal4	LAL	feb1616	1
EBIRP I-O-LAL.s-to-SMP.s-LAL.s-LAL.b.contra	72H06LexA-75H04Gal4-Chrimson-in-Gal4	LAL	feb1716	5
EBIRP I-O-LAL.s-to-SMP.s-LAL.s-LAL.b.contra	72H06LexA-75H04Gal4-Chrimson-in-Gal4	LAL	feb1716	4
EBIRP I-O-LAL.s-to-SMP.s-LAL.s-LAL.b.contra	72H06LexA-75H04Gal4-Chrimson-in-Gal4	LAL	feb1716	3
EBIRP I-O-LAL.s-to-SMP.s-LAL.s-LAL.b.contra	72H06LexA-75H04Gal4-Chrimson-in-Gal4	LAL	feb1816	1
EBORP O-I-GA-Bulb-to-EBORP O-I-GA-Bulb	18A05LexA-18A05Gal4-Chrimson-in-LexA	Gall	jul1616	3
EBORP O-I-GA-Bulb-to-EBORP O-I-GA-Bulb	18A05LexA-18A05Gal4-Chrimson-in-LexA	Gall	jul1616	1
EBORP O-I-GA-Bulb-to-EBORP O-I-GA-Bulb	18A05LexA-18A05Gal4-Chrimson-in-LexA	Gall	jul1716	2
EBORP O-I-GA-Bulb-to-EBORP O-I-GA-Bulb	18A05LexA-18A05Gal4-Chrimson-in-LexA	EB	jul1716	1
EBORP O-I-GA-Bulb-to-EBORP O-I-GA-Bulb	18A05LexA-18A05Gal4-Chrimson-in-LexA	Gall	jul1716	1
EBORP O-I-GA-Bulb-to-EBORP O-I-GA-Bulb	18A05LexA-18A05Gal4-Chrimson-in-LexA	Gall	jul1816	2
EBORP O-I-GA-Bulb-to-EBORP O-I-GA-Bulb	18A05LexA-18A05Gal4-Chrimson-in-LexA	Gall	jul1816	1
EBORP O-I-GA-Bulb-to-EBORP O-I-GA-Bulb	18A05LexA-18A05Gal4-Chrimson-in-LexA	Gall	jul1916	2
EBORP O-I-GA-Bulb-to-EBORP O-I-GA-Bulb	18A05LexA-18A05Gal4-Chrimson-in-LexA	Gall	jul1916	1
EBORP O-I-GA-Bulb-to-PBG1-8.b-EBw.s-DV_GA.b	60D05LexA-18A05Gal4-Chrimson-in-Gal4	EB	dec2115	2
EBORP O-I-GA-Bulb-to-PBG1-8.b-EBw.s-DV_GA.b	60D05LexA-18A05Gal4-Chrimson-in-Gal4	EB	dec2115	1
EBORP O-I-GA-Bulb-to-PBG1-8.b-EBw.s-DV_GA.b	60D05LexA-18A05Gal4-Chrimson-in-Gal4	EB	dec2215	1
EBORP O-I-GA-Bulb-to-PBG1-8.b-EBw.s-DV_GA.b	18A05LexA-60D05Gal4-Chrimson-in-LexA	EB	nov0215	3
EBORP O-I-GA-Bulb-to-PBG1-8.b-EBw.s-DV_GA.b	18A05LexA-60D05Gal4-Chrimson-in-LexA	EB	nov0315	5
EBORP O-I-GA-Bulb-to-PBG1-8.b-EBw.s-DV_GA.b	18A05LexA-60D05Gal4-Chrimson-in-LexA	EB	nov0315	4
LAL.s-GAi.s-NO1i.b-to-EBIRP I-O-LAL.s	76E11LexA-75H04Gal4-Chrimson-in-LexA	EB	jun2316	3
LAL.s-GAi.s-NO1i.b-to-EBIRP I-O-LAL.s	76E11LexA-75H04Gal4-Chrimson-in-LexA	EB	jun2316	2
LAL.s-GAi.s-NO1i.b-to-EBIRP I-O-LAL.s	76E11LexA-75H04Gal4-Chrimson-in-LexA	EB	jun2316	1
LAL.s-GAi.s-NO1i.b-to-EBIRP I-O-LAL.s	76E11LexA-75H04Gal4-Chrimson-in-LexA	EB-in	may1616	8
LAL.s-GAi.s-NO1i.b-to-EBIRP I-O-LAL.s	76E11LexA-75H04Gal4-Chrimson-in-LexA	EB-in	may1616	7
LAL.s-GAi.s-NO1i.b-to-EBIRP I-O-LAL.s	76E11LexA-75H04Gal4-Chrimson-in-LexA	EB-in	may1616	5
LAL.s-GAi.s-NO1i.b-to-EBIRP I-O-LAL.s	76E11LexA-75H04Gal4-Chrimson-in-LexA	EB-in	may1616	4
LAL.s-GAi.s-NO1i.b-to-EBMRP I-O-LAL.s	76E11LexA-32A11Gal4-Chrimson-in-LexA	EB	jul0516	4
LAL.s-GAi.s-NO1i.b-to-EBMRP I-O-LAL.s	76E11LexA-32A11Gal4-Chrimson-in-LexA	EB-in	jul0516	4
LAL.s-GAi.s-NO1i.b-to-EBMRP I-O-LAL.s	76E11LexA-32A11Gal4-Chrimson-in-LexA	EB	jul0516	3
LAL.s-GAi.s-NO1i.b-to-EBMRP I-O-LAL.s	76E11LexA-32A11Gal4-Chrimson-in-LexA	EB	jul0616	2
LAL.s-GAi.s-NO1i.b-to-EBMRP I-O-LAL.s	76E11LexA-32A11Gal4-Chrimson-in-LexA	EB	jul0616	1
LAL.s-GAi.s-NO1i.b-to-EBMRP I-O-LAL.s	76E11LexA-32A11Gal4-Chrimson-in-LexA	EB	jul0716	5
LAL.s-GAi.s-NO1i.b-to-EBMRP I-O-LAL.s	76E11LexA-32A11Gal4-Chrimson-in-LexA	EB	jul0716	4
LAL.s-GAi.s-NO1i.b-to-EBMRP I-O-LAL.s	76E11LexA-32A11Gal4-Chrimson-in-LexA	EB	jul0816	6
LAL.s-GAi.s-NO1i.b-to-EBMRP I-O-LAL.s	76E11LexA-32A11Gal4-Chrimson-in-LexA	EB-in	jul0816	6
LAL.s-GAi.s-NO1i.b-to-EBMRP I-O-LAL.s	76E11LexA-32A11Gal4-Chrimson-in-LexA	EB	jul1116	2
LAL.s-GAi.s-NO1i.b-to-EBMRP I-O-LAL.s	76E11LexA-32A11Gal4-Chrimson-in-LexA	EB-in	jul1116	2
LAL.s-GAi.s-NO1i.b-to-EBMRP I-O-LAL.s	76E11LexA-32A11Gal4-Chrimson-in-LexA	EB	jul1116	1
LAL.s-GAi.s-NO1i.b-to-EBMRP I-O-LAL.s	76E11LexA-32A11Gal4-Chrimson-in-LexA	EB-in	jul1116	1
LAL.s-GAi.s-NO1i.b-to-LAL.s-GAi.s-NO1i.b	76E11LexA-76E11Gal4-Chrimson-in-Gal4	LAL	jun1416	6
LAL.s-GAi.s-NO1i.b-to-LAL.s-GAi.s-NO1i.b	76E11LexA-76E11Gal4-Chrimson-in-LexA	LAL	jun1616	3
LAL.s-GAi.s-NO1i.b-to-LAL.s-GAi.s-NO1i.b	76E11LexA-76E11Gal4-Chrimson-in-LexA	LAL	jun1816	3
LAL.s-GAi.s-NO1i.b-to-LAL.s-GAi.s-NO1i.b	76E11LexA-76E11Gal4-Chrimson-in-LexA	LAL	jun1816	2
LAL.s-GAi.s-NO1i.b-to-LAL.s-GAi.s-NO1i.b	76E11LexA-76E11Gal4-Chrimson-in-LexA	LAL	jun1816	1
LAL.s-GAi.s-NO1i.b-to-LAL.s-GAi.s-NO1i.b	76E11LexA-76E11Gal4-Chrimson-in-LexA	NO	jun1816	1
LAL.s-GAi.s-NO1i.b-to-LAL.s-GAi.s-NO1i.b	76E11LexA-76E11Gal4-Chrimson-in-LexA	LAL	jun1916	3
LAL.s-GAi.s-NO1i.b-to-PBG2-9.s-EBt.b-NO1.b.Type1	76E11LexA-37F06Gal4-Chrimson-in-LexA	EB	jul2216	5
LAL.s-GAi.s-NO1i.b-to-PBG2-9.s-EBt.b-NO1.b.Type1	76E11LexA-37F06Gal4-Chrimson-in-LexA	EB	jul2216	4
LAL.s-GAi.s-NO1i.b-to-PBG2-9.s-EBt.b-NO1.b.Type1	76E11LexA-37F06Gal4-Chrimson-in-LexA	EB	jul2316	1
LAL.s-GAi.s-NO1i.b-to-PBG2-9.s-EBt.b-NO1.b.Type1	37F06LexA-76E11Gal4-Chrimson-in-Gal4	EB	jun0315	2
LAL.s-GAi.s-NO1i.b-to-PBG2-9.s-EBt.b-NO1.b.Type1	37F06LexA-76E11Gal4-Chrimson-in-Gal4	EB	jun0315	1
LAL.s-GAi.s-NO1i.b-to-PBG2-9.s-EBt.b-NO1.b.Type1	76E11LexA-37F06Gal4-Chrimson-in-LexA	EB	may2316	2
LAL.s-GAi.s-NO1i.b-to-PBG2-9.s-EBt.b-NO1.b.Type1	76E11LexA-37F06Gal4-Chrimson-in-LexA	EB	may2316	1
LAL.s-GAi.s-NO1i.b-to-PBG2-9.s-EBt.b-NO1.b.Type1	76E11LexA-37F06Gal4-Chrimson-in-LexA	EB	may2416	1
LAL.s-GAi.s-NO1i.b-to-PBG2-9.s-EBt.b-NO1.b.Type2	76E11-VK22LexA-SS02232Gal4-Chrimson-in-LexA	EB	jun1517	2
LAL.s-GAi.s-NO1i.b-to-PBG2-9.s-EBt.b-NO1.b.Type2	76E11-VK22LexA-SS02232Gal4-Chrimson-in-LexA	EB	jun1517	1
LAL.s-GAi.s-NO1i.b-to-PBG2-9.s-EBt.b-NO1.b.Type2	76E11-VK22LexA-SS02232Gal4-Chrimson-in-LexA	EB	jun1617	1
LAL.s-GAi.s-NO1i.b-to-PBG2-9.s-EBt.b-NO1.b.Type2	76E11-VK22LexA-SS02232Gal4-Chrimson-in-LexA	EB	jun1917	4
LAL.s-GAi.s-NO1i.b-to-PBG2-9.s-EBt.b-NO1.b.Type2	76E11-VK22LexA-SS02232Gal4-Chrimson-in-LexA	EB	jun1917	3
LAL.s-GAi.s-NO1i.b-to-PBG2-9.s-EBt.b-NO1.b.Type2	76E11-VK22LexA-SS02232Gal4-Chrimson-in-LexA	EB	jun1917	1
LAL.s-GAi.s-NO1i.b-to-PBG2-9.s-FBl1.b-NO3PM.b	76E11LexA-85H06Gal4-Chrimson-in-LexA	FB	jul0516	9
LAL.s-GAi.s-NO1i.b-to-PBG2-9.s-FBl1.b-NO3PM.b	76E11LexA-85H06Gal4-Chrimson-in-LexA	FB	jul0616	7
LAL.s-GAi.s-NO1i.b-to-PBG2-9.s-FBl1.b-NO3PM.b	76E11LexA-85H06Gal4-Chrimson-in-LexA	FB	jul0616	6
LAL.s-GAi.s-NO1i.b-to-PBG2-9.s-FBl1.b-NO3PM.b	76E11LexA-85H06Gal4-Chrimson-in-LexA	FB	jul0616	5
LAL.s-GAi.s-NO1i.b-to-PBG2-9.s-FBl1.b-NO3PM.b	76E11LexA-85H06Gal4-Chrimson-in-LexA	FB	jul0716	9
LAL.s-GAi.s-NO1i.b-to-PBG2-9.s-FBl1.b-NO3PM.b	76E11LexA-85H06Gal4-Chrimson-in-LexA	FB	jul0816	5
LAL.s-GAi.s-NO1i.b-to-PBG2-9.s-FBl3.b-NO2D.b	76E11LexA-87G07Gal4-Chrimson-in-LexA	FB	apr1316	3
LAL.s-GAi.s-NO1i.b-to-PBG2-9.s-FBl3.b-NO2D.b	76E11LexA-87G07Gal4-Chrimson-in-LexA	FB	apr1316	2
LAL.s-GAi.s-NO1i.b-to-PBG2-9.s-FBl3.b-NO2D.b	76E11LexA-87G07Gal4-Chrimson-in-LexA	FB	apr1416	4
LAL.s-GAi.s-NO1i.b-to-PBG2-9.s-FBl3.b-NO2D.b	76E11LexA-87G07Gal4-Chrimson-in-LexA	FB	apr1416	3
LAL.s-GAi.s-NO1i.b-to-PBG2-9.s-FBl3.b-NO2D.b	76E11LexA-87G07Gal4-Chrimson-in-LexA	FB	apr1416	2
LAL.s-GAi.s-NO1i.b-to-PBG2-9.s-FBl3.b-NO2D.b	76E11LexA-87G07Gal4-Chrimson-in-LexA	FB	apr1416	1
LAL.s-GAi.s-NO1i.b-to-PBG2-9.s-FBl3.b-NO2V.b	67D09LexA-76E11Gal4-Chrimson-in-Gal4	FB	jul1016	3
LAL.s-GAi.s-NO1i.b-to-PBG2-9.s-FBl3.b-NO2V.b	67D09LexA-76E11Gal4-Chrimson-in-Gal4	FB	jul1016	2
LAL.s-GAi.s-NO1i.b-to-PBG2-9.s-FBl3.b-NO2V.b	67D09LexA-76E11Gal4-Chrimson-in-Gal4	FB	jul1016	1
LAL.s-GAi.s-NO1i.b-to-PBG2-9.s-FBl3.b-NO2V.b	67D09LexA-76E11Gal4-Chrimson-in-Gal4	FB	jul1116	4
LAL.s-GAi.s-NO1i.b-to-PBG2-9.s-FBl3.b-NO2V.b	67D09LexA-76E11Gal4-Chrimson-in-Gal4	FB	jul1116	3
LAL.s-GAi.s-NO1i.b-to-PBG2-9.s-FBl3.b-NO2V.b	67D09LexA-76E11Gal4-Chrimson-in-Gal4	FB	may1116	9
LAL.s-IMP-FBl3.b-to-PBG1-7.s-FBl2.s-LAL.b-cre.b	84H05LexA-49H05Gal4-Chrimson-in-Gal4	FB-in	dec2815	4
LAL.s-IMP-FBl3.b-to-PBG1-7.s-FBl2.s-LAL.b-cre.b	84H05LexA-49H05Gal4-Chrimson-in-Gal4	FB-in	dec2815	3
LAL.s-IMP-FBl3.b-to-PBG1-7.s-FBl2.s-LAL.b-cre.b	84H05LexA-49H05Gal4-Chrimson-in-Gal4	FB-in	jun2316	8
LAL.s-IMP-FBl3.b-to-PBG1-7.s-FBl2.s-LAL.b-cre.b	84H05LexA-49H05Gal4-Chrimson-in-Gal4	FB-in	jun2316	7
LAL.s-IMP-FBl3.b-to-PBG1-7.s-FBl2.s-LAL.b-cre.b	84H05LexA-49H05Gal4-Chrimson-in-Gal4	FB-in	jun2416	4
LAL.s-IMP-FBl3.b-to-PBG1-7.s-FBl2.s-LAL.b-cre.b	84H05LexA-49H05Gal4-Chrimson-in-Gal4	FB-in	jun2416	3
LAL.s-NO3Ai.b-to-LAL.s-IMP-FBl3.b	12G04LexA-49H05Gal4-Chrimson-in-LexA	LAL-out	may1416	5
LAL.s-NO3Ai.b-to-LAL.s-IMP-FBl3.b	12G04LexA-49H05Gal4-Chrimson-in-LexA	LAL-out	may1516	1
LAL.s-NO3Ai.b-to-LAL.s-IMP-FBl3.b	12G04LexA-49H05Gal4-Chrimson-in-LexA	LAL-out	may1616	3
LAL.s-NO3Ai.b-to-LAL.s-IMP-FBl3.b	12G04LexA-49H05Gal4-Chrimson-in-LexA	LAL-out	may1616	2
LAL.s-NO3Ai.b-to-LAL.s-IMP-FBl3.b	12G04LexA-49H05Gal4-Chrimson-in-LexA	LAL-out	may1716	1
LAL.s-NO3Ai.b-to-Wedge-LAL.s-LAL.b.contra	12G04LexA-26B07Gal4-Chrimson-in-LexA	LAL	dec3115	6
LAL.s-NO3Ai.b-to-Wedge-LAL.s-LAL.b.contra	12G04LexA-26B07Gal4-Chrimson-in-LexA	LAL	dec3115	5
LAL.s-NO3Ai.b-to-Wedge-LAL.s-LAL.b.contra	12G04LexA-26B07Gal4-Chrimson-in-LexA	LAL	jan0416	6
LAL.s-NO3Ai.b-to-Wedge-LAL.s-LAL.b.contra	12G04LexA-26B07Gal4-Chrimson-in-LexA	LAL	jan0416	5
LAL.s-NO3Ai.b-to-Wedge-LAL.s-LAL.b.contra	12G04LexA-26B07Gal4-Chrimson-in-LexA	LAL	jan0616	2
LAL.s-NO3Ai.b-to-Wedge-LAL.s-LAL.b.contra	12G04LexA-26B07Gal4-Chrimson-in-LexA	LAL	jan0616	1
PB18.s-GxΔ7Gy.b-PB18.s-9i1i8c.b-to-PBG1-7.s-FBl2.s-LAL.b-cre.b	84H05LexA-55G08Gal4-Chrimson-in-Gal4	LAL	jul0616	8
PB18.s-GxΔ7Gy.b-PB18.s-9i1i8c.b-to-PBG1-7.s-FBl2.s-LAL.b-cre.b	84H05LexA-55G08Gal4-Chrimson-in-Gal4	FB	jul0716	3
PB18.s-GxΔ7Gy.b-PB18.s-9i1i8c.b-to-PBG1-7.s-FBl2.s-LAL.b-cre.b	84H05LexA-55G08Gal4-Chrimson-in-Gal4	LAL	jul0716	1
PB18.s-GxΔ7Gy.b-PB18.s-9i1i8c.b-to-PBG1-7.s-FBl2.s-LAL.b-cre.b	84H05LexA-55G08Gal4-Chrimson-in-Gal4	LAL	jul0816	3
PB18.s-GxΔ7Gy.b-PB18.s-9i1i8c.b-to-PBG1-7.s-FBl2.s-LAL.b-cre.b	84H05LexA-55G08Gal4-Chrimson-in-Gal4	FB	jul0816	2
PB18.s-GxΔ7Gy.b-PB18.s-9i1i8c.b-to-PBG1-7.s-FBl2.s-LAL.b-cre.b	84H05LexA-55G08Gal4-Chrimson-in-Gal4	LAL	jul0816	2
PB18.s-GxΔ7Gy.b-PB18.s-9i1i8c.b-to-PBG1-7.s-FBl2.s-LAL.b-cre.b	84H05LexA-55G08Gal4-Chrimson-in-Gal4	FB	jul0816	1
PB18.s-GxΔ7Gy.b-PB18.s-9i1i8c.b-to-PBG1-7.s-FBl2.s-LAL.b-cre.b	84H05LexA-55G08Gal4-Chrimson-in-Gal4	LAL	jul0816	1
PB18.s-GxΔ7Gy.b-PB18.s-9i1i8c.b-to-PBG1-8.b-EBw.s-DV_GA.b	60D05LexA-55G08Gal4-Chrimson-in-Gal4	EB	dec3115	2
PB18.s-GxΔ7Gy.b-PB18.s-9i1i8c.b-to-PBG1-8.b-EBw.s-DV_GA.b	60D05LexA-55G08Gal4-Chrimson-in-Gal4	EB	dec3115	1
PB18.s-GxΔ7Gy.b-PB18.s-9i1i8c.b-to-PBG1-8.b-EBw.s-DV_GA.b	60D05LexA-55G08Gal4-Chrimson-in-Gal4	EB	jan0416	4
PB18.s-GxΔ7Gy.b-PB18.s-9i1i8c.b-to-PBG1-8.b-EBw.s-DV_GA.b	60D05LexA-55G08Gal4-Chrimson-in-Gal4	EB	jan0416	3
PB18.s-GxΔ7Gy.b-PB18.s-9i1i8c.b-to-PBG1-8.b-EBw.s-DV_GA.b	60D05LexA-55G08Gal4-Chrimson-in-Gal4	EB	jan0516	2
PB18.s-GxΔ7Gy.b-PB18.s-9i1i8c.b-to-PBG1-8.b-EBw.s-DV_GA.b	60D05LexA-55G08Gal4-Chrimson-in-Gal4	EB	jan0516	1
PB18.s-GxΔ7Gy.b-PB18.s-9i1i8c.b-to-PBG1-8.s-EBt.b-DV_GA.b	55G08-attP5LexA-SS02191Gal4-Chrimson-in-LexA	EB	feb1317	2
PB18.s-GxΔ7Gy.b-PB18.s-9i1i8c.b-to-PBG1-8.s-EBt.b-DV_GA.b	55G08-attP5LexA-SS02191Gal4-Chrimson-in-LexA	EB	feb1317	1
PB18.s-GxΔ7Gy.b-PB18.s-9i1i8c.b-to-PBG1-8.s-EBt.b-DV_GA.b	55G08-attP5LexA-SS02191Gal4-Chrimson-in-LexA	EB	feb1417	1
PB18.s-GxΔ7Gy.b-PB18.s-9i1i8c.b-to-PBG1-8.s-EBt.b-DV_GA.b	55G08-attP5LexA-SS02191Gal4-Chrimson-in-LexA	EB	feb1617	3
PB18.s-GxΔ7Gy.b-PB18.s-9i1i8c.b-to-PBG1-8.s-EBt.b-DV_GA.b	55G08-attP5LexA-SS02191Gal4-Chrimson-in-LexA	EB	feb1617	2
PB18.s-GxΔ7Gy.b-PB18.s-9i1i8c.b-to-PBG1-8.s-EBt.b-DV_GA.b	55G08-attP5LexA-SS02191Gal4-Chrimson-in-LexA	EB	feb1617	1
PB18.s-GxΔ7Gy.b-PB18.s-9i1i8c.b-to-PBG2-9.b-IB.s.SPS.s	47G08LexA-55G08Gal4-Chrimson-in-Gal4	PB-in	feb0116	3
PB18.s-GxΔ7Gy.b-PB18.s-9i1i8c.b-to-PBG2-9.b-IB.s.SPS.s	47G08LexA-55G08Gal4-Chrimson-in-Gal4	PB-out	jan2816	2
PB18.s-GxΔ7Gy.b-PB18.s-9i1i8c.b-to-PBG2-9.b-IB.s.SPS.s	47G08LexA-55G08Gal4-Chrimson-in-Gal4	PB-out	jan2816	1
PB18.s-GxΔ7Gy.b-PB18.s-9i1i8c.b-to-PBG2-9.b-IB.s.SPS.s	47G08LexA-55G08Gal4-Chrimson-in-Gal4	PB-in	jan2916	4
PB18.s-GxΔ7Gy.b-PB18.s-9i1i8c.b-to-PBG2-9.b-IB.s.SPS.s	47G08LexA-55G08Gal4-Chrimson-in-Gal4	PB-in	nov2015	2
PB18.s-GxΔ7Gy.b-PB18.s-9i1i8c.b-to-PBG2-9.b-IB.s.SPS.s	47G08LexA-55G08Gal4-Chrimson-in-Gal4	PB-in	nov2015	1
PB18.s-GxΔ7Gy.b-PB18.s-9i1i8c.b-to-PBG2-9.s-EBt.b-NO1.b.Type1	55G08LexA-VT008135Gal4-Chrimson-in-LexA	EB	jan1817	3
PB18.s-GxΔ7Gy.b-PB18.s-9i1i8c.b-to-PBG2-9.s-EBt.b-NO1.b.Type1	55G08LexA-VT008135Gal4-Chrimson-in-LexA	EB	jan1917	5
PB18.s-GxΔ7Gy.b-PB18.s-9i1i8c.b-to-PBG2-9.s-EBt.b-NO1.b.Type1	55G08LexA-VT008135Gal4-Chrimson-in-LexA	EB	jan1917	4
PB18.s-GxΔ7Gy.b-PB18.s-9i1i8c.b-to-PBG2-9.s-EBt.b-NO1.b.Type1	55G08LexA-VT008135Gal4-Chrimson-in-LexA	EB	jan1917	3
PB18.s-GxΔ7Gy.b-PB18.s-9i1i8c.b-to-PBG2-9.s-EBt.b-NO1.b.Type1	55G08LexA-VT008135Gal4-Chrimson-in-LexA	EB	jan1917	2
PB18.s-GxΔ7Gy.b-PB18.s-9i1i8c.b-to-PBG2-9.s-EBt.b-NO1.b.Type1	55G08LexA-VT008135Gal4-Chrimson-in-LexA	EB	jan1917	1
PB18.s-GxΔ7Gy.b-PB18.s-9i1i8c.b-to-PBG2-9.s-EBt.b-NO1.b.Type2	55G08-attP5LexA-SS02232Gal4-Chrimson-in-LexA	EB+NO	feb1617	5
PB18.s-GxΔ7Gy.b-PB18.s-9i1i8c.b-to-PBG2-9.s-EBt.b-NO1.b.Type2	55G08-attP5LexA-SS02232Gal4-Chrimson-in-LexA	EB+NO	feb1617	4
PB18.s-GxΔ7Gy.b-PB18.s-9i1i8c.b-to-PBG2-9.s-EBt.b-NO1.b.Type2	55G08-VK22LexA-SS02232Gal4-Chrimson-in-LexA	PB-out	jun1217	3
PB18.s-GxΔ7Gy.b-PB18.s-9i1i8c.b-to-PBG2-9.s-EBt.b-NO1.b.Type2	55G08-VK22LexA-SS02232Gal4-Chrimson-in-LexA	PB-out	jun1217	2
PB18.s-GxΔ7Gy.b-PB18.s-9i1i8c.b-to-PBG2-9.s-EBt.b-NO1.b.Type2	55G08-VK22LexA-SS02232Gal4-Chrimson-in-LexA	PB-out	jun1217	1
PB18.s-GxΔ7Gy.b-PB18.s-9i1i8c.b-to-PBG2-9.s-EBt.b-NO1.b.Type2	55G08-attP5LexA-SS02232Gal4-Chrimson-in-LexA	EB+NO	oct0516	2
PB18.s-GxΔ7Gy.b-PB18.s-9i1i8c.b-to-PBG2-9.s-FBl1.b-NO3PM.b	55G08LexA-85H06Gal4-Chrimson-in-LexA	FB	nov1215	1
PB18.s-GxΔ7Gy.b-PB18.s-9i1i8c.b-to-PBG2-9.s-FBl1.b-NO3PM.b	55G08LexA-85H06Gal4-Chrimson-in-LexA	FB	nov1715	3
PB18.s-GxΔ7Gy.b-PB18.s-9i1i8c.b-to-PBG2-9.s-FBl1.b-NO3PM.b	55G08LexA-85H06Gal4-Chrimson-in-LexA	FB	nov1715	2
PB18.s-GxΔ7Gy.b-PB18.s-9i1i8c.b-to-PBG2-9.s-FBl1.b-NO3PM.b	55G08LexA-85H06Gal4-Chrimson-in-LexA	FB	nov1815	6
PB18.s-GxΔ7Gy.b-PB18.s-9i1i8c.b-to-PBG2-9.s-FBl1.b-NO3PM.b	55G08LexA-85H06Gal4-Chrimson-in-LexA	FB	nov1815	5
PB18.s-GxΔ7Gy.b-PB18.s-9i1i8c.b-to-PBG2-9.s-FBl3.b-NO2D.b	55G08LexA-87G07Gal4-Chrimson-in-LexA	FB	nov1915	2
PB18.s-GxΔ7Gy.b-PB18.s-9i1i8c.b-to-PBG2-9.s-FBl3.b-NO2V.b	67D09LexA-55G08Gal4-Chrimson-in-Gal4	FB	jul2416	5
PB18.s-GxΔ7Gy.b-PB18.s-9i1i8c.b-to-PBG2-9.s-FBl3.b-NO2V.b	67D09LexA-55G08Gal4-Chrimson-in-Gal4	FB	jul2416	3
PB18.s-GxΔ7Gy.b-PB18.s-9i1i8c.b-to-PBG2-9.s-FBl3.b-NO2V.b	67D09LexA-55G08Gal4-Chrimson-in-Gal4	FB	jul2416	2
PB18.s-GxΔ7Gy.b-PB18.s-9i1i8c.b-to-PBG2-9.s-FBl3.b-NO2V.b	67D09LexA-55G08Gal4-Chrimson-in-Gal4	FB	jul2416	1
PBG1-7.s-FBl2.s-LAL.b-cre.b-to-EBIRP I-O-LAL.s	84H05LexA-75H04Gal4-Chrimson-in-LexA	EB	jan0416	1
PBG1-7.s-FBl2.s-LAL.b-cre.b-to-EBIRP I-O-LAL.s	84H05LexA-75H04Gal4-Chrimson-in-LexA	EB	jan0516	5
PBG1-7.s-FBl2.s-LAL.b-cre.b-to-EBIRP I-O-LAL.s	84H05LexA-75H04Gal4-Chrimson-in-LexA	EB	jan0516	4
PBG1-7.s-FBl2.s-LAL.b-cre.b-to-EBIRP I-O-LAL.s	84H05LexA-75H04Gal4-Chrimson-in-LexA	EB	jan0516	3
PBG1-7.s-FBl2.s-LAL.b-cre.b-to-EBIRP I-O-LAL.s	84H05LexA-75H04Gal4-Chrimson-in-LexA	EB	jan0616	3
PBG1-7.s-FBl2.s-LAL.b-cre.b-to-EBIRP I-O-LAL.s	84H05LexA-75H04Gal4-Chrimson-in-LexA	EB	jan0716	1
PBG1-7.s-FBl2.s-LAL.b-cre.b-to-LAL.s-IMP-FBl3.b	49H05LexA-84H05Gal4-Chrimson-in-Gal4	LAL-out	feb1616	4
PBG1-7.s-FBl2.s-LAL.b-cre.b-to-LAL.s-IMP-FBl3.b	49H05LexA-84H05Gal4-Chrimson-in-Gal4	LAL-out	feb1616	3
PBG1-7.s-FBl2.s-LAL.b-cre.b-to-LAL.s-IMP-FBl3.b	49H05LexA-84H05Gal4-Chrimson-in-Gal4	LAL-out	nov1215
PBG1-7.s-FBl2.s-LAL.b-cre.b-to-LAL.s-IMP-FBl3.b	49H05LexA-84H05Gal4-Chrimson-in-Gal4	LAL-out	nov1215	3
PBG1-7.s-FBl2.s-LAL.b-cre.b-to-LAL.s-IMP-FBl3.b	49H05LexA-84H05Gal4-Chrimson-in-Gal4	LAL-out	nov1315	2
PBG1-7.s-FBl2.s-LAL.b-cre.b-to-LAL.s-IMP-FBl3.b	49H05LexA-84H05Gal4-Chrimson-in-Gal4	LAL-out	nov1315	1
PBG1-7.s-FBl2.s-LAL.b-cre.b-to-PBG1-7.s-FBl2.s-LAL.b-cre.b	84H05LexA-84H05Gal4-Chrimson-in-Gal4	LAL	jun1416	8
PBG1-7.s-FBl2.s-LAL.b-cre.b-to-PBG1-7.s-FBl2.s-LAL.b-cre.b	84H05LexA-84H05Gal4-Chrimson-in-LexA	LAL	jun1516	8
PBG1-7.s-FBl2.s-LAL.b-cre.b-to-PBG1-7.s-FBl2.s-LAL.b-cre.b	84H05LexA-84H05Gal4-Chrimson-in-LexA	LAL	jun1516	7
PBG1-7.s-FBl2.s-LAL.b-cre.b-to-PBG1-7.s-FBl2.s-LAL.b-cre.b	84H05LexA-84H05Gal4-Chrimson-in-LexA	LAL	jun1516	6
PBG1-7.s-FBl2.s-LAL.b-cre.b-to-PBG1-7.s-FBl2.s-LAL.b-cre.b	84H05LexA-84H05Gal4-Chrimson-in-LexA	LAL	jun1516	5
PBG1-7.s-FBl2.s-LAL.b-cre.b-to-PBG1-7.s-FBl2.s-LAL.b-cre.b	84H05LexA-84H05Gal4-Chrimson-in-LexA	LAL	jun1616	1
PBG1-7.s-FBl2.s-LAL.b-cre.b-to-PBG1-7.s-FBl2.s-LAL.b-cre.b	84H05LexA-84H05Gal4-Chrimson-in-LexA	LAL	jun2216	3
PBG1-7.s-FBl2.s-LAL.b-cre.b-to-PBG1-7.s-FBl2.s-LAL.b-cre.b	84H05LexA-84H05Gal4-Chrimson-in-LexA	LAL	jun2216	2
PBG1-7.s-FBl2.s-LAL.b-cre.b-to-PBG1-7.s-FBl2.s-LAL.b-cre.b	84H05LexA-84H05Gal4-Chrimson-in-LexA	LAL	jun2216	1
PBG1-7.s-FBl2.s-LAL.b-cre.b-to-PBG1-7.s-FBl2.s-LAL.b-cre.b	84H05LexA-84H05Gal4-Chrimson-in-LexA	LAL	jun2616	4
PBG1-7.s-FBl2.s-LAL.b-cre.b-to-PBG1-7.s-FBl2.s-LAL.b-cre.b	84H05LexA-84H05Gal4-Chrimson-in-LexA	LAL	jun2616	3
PBG1-7.s-FBl2.s-LAL.b-cre.b-to-PBG1-7.s-FBl2.s-LAL.b-cre.b	84H05LexA-84H05Gal4-Chrimson-in-LexA	LAL	jun2716	1
PBG1-7.s-FBl2.s-LAL.b-cre.b-to-SMP.s-LAL.s-LAL.b.contra	84H05LexA-72H06Gal4-Chrimson-in-LexA	LAL	feb1716	2
PBG1-7.s-FBl2.s-LAL.b-cre.b-to-SMP.s-LAL.s-LAL.b.contra	84H05LexA-72H06Gal4-Chrimson-in-LexA	LAL	feb1716	1
PBG1-7.s-FBl2.s-LAL.b-cre.b-to-SMP.s-LAL.s-LAL.b.contra	84H05LexA-72H06Gal4-Chrimson-in-LexA	LAL	feb1816	3
PBG1-7.s-FBl2.s-LAL.b-cre.b-to-SMP.s-LAL.s-LAL.b.contra	84H05LexA-72H06Gal4-Chrimson-in-LexA	LAL	feb1816	2
PBG1-7.s-FBl2.s-LAL.b-cre.b-to-SMP.s-LAL.s-LAL.b.contra	84H05LexA-72H06Gal4-Chrimson-in-LexA	LAL	feb1916	2
PBG1-7.s-FBl2.s-LAL.b-cre.b-to-SMP.s-LAL.s-LAL.b.contra	84H05LexA-72H06Gal4-Chrimson-in-LexA	LAL	feb1916	1
PBG1-7.s-FBl2.s-LAL.b-cre.b-to-SMP.s-LAL.s-LAL.b.contra2	84H05-attP5LexA-SS02615Gal4-Chrimson-in-LexA	LAL	jun2717	8
PBG1-7.s-FBl2.s-LAL.b-cre.b-to-SMP.s-LAL.s-LAL.b.contra2	84H05-attP5LexA-SS02615Gal4-Chrimson-in-LexA	LAL	jun2717	7
PBG1-7.s-FBl2.s-LAL.b-cre.b-to-SMP.s-LAL.s-LAL.b.contra2	84H05-attP5LexA-SS02615Gal4-Chrimson-in-LexA	LAL	jun2817	6
PBG1-7.s-FBl2.s-LAL.b-cre.b-to-SMP.s-LAL.s-LAL.b.contra2	84H05-attP5LexA-SS02615Gal4-Chrimson-in-LexA	LAL	jun2817	5
PBG1-7.s-FBl2.s-LAL.b-cre.b-to-SMP.s-LAL.s-LAL.b.contra2	84H05-attP5LexA-SS02615Gal4-Chrimson-in-LexA	LAL	jun2817	2
PBG1-7.s-FBl2.s-LAL.b-cre.b-to-SMP.s-LAL.s-LAL.b.contra2	84H05-attP5LexA-SS02615Gal4-Chrimson-in-LexA	LAL	jun2817	1
PBG1-7.s-FBl2.s-LAL.b-cre.b-to-Wedge-LAL.s-LAL.b.contra	84H05LexA-26B07Gal4-Chrimson-in-LexA	LAL	feb0516	2
PBG1-7.s-FBl2.s-LAL.b-cre.b-to-Wedge-LAL.s-LAL.b.contra	84H05LexA-26B07Gal4-Chrimson-in-LexA	LAL	feb0516	1
PBG1-7.s-FBl2.s-LAL.b-cre.b-to-Wedge-LAL.s-LAL.b.contra	84H05LexA-26B07Gal4-Chrimson-in-LexA	LAL	feb0816	4
PBG1-7.s-FBl2.s-LAL.b-cre.b-to-Wedge-LAL.s-LAL.b.contra	84H05LexA-26B07Gal4-Chrimson-in-LexA	LAL	feb0816	3
PBG1-7.s-FBl2.s-LAL.b-cre.b-to-Wedge-LAL.s-LAL.b.contra	84H05LexA-26B07Gal4-Chrimson-in-LexA	LAL	feb0916	4
PBG1-7.s-FBl2.s-LAL.b-cre.b-to-Wedge-LAL.s-LAL.b.contra	84H05LexA-26B07Gal4-Chrimson-in-LexA	LAL	feb0916	3
PBG1-8.b-EBw.s-DV_GA.b-to-EB.w-AMP.d-D_GAsurround	60D05LexA-17H12Gal4-Chrimson-in-LexA	EB	feb0516	4
PBG1-8.b-EBw.s-DV_GA.b-to-EB.w-AMP.d-D_GAsurround	60D05LexA-17H12Gal4-Chrimson-in-LexA	EB	feb0516	3
PBG1-8.b-EBw.s-DV_GA.b-to-EB.w-AMP.d-D_GAsurround	60D05LexA-17H12Gal4-Chrimson-in-LexA	EB	feb0816	6
PBG1-8.b-EBw.s-DV_GA.b-to-EB.w-AMP.d-D_GAsurround	60D05LexA-17H12Gal4-Chrimson-in-LexA	EB	feb0816	5
PBG1-8.b-EBw.s-DV_GA.b-to-EB.w-AMP.d-D_GAsurround	60D05LexA-17H12Gal4-Chrimson-in-LexA	EB	feb0916	6
PBG1-8.b-EBw.s-DV_GA.b-to-EB.w-AMP.d-D_GAsurround	60D05LexA-17H12Gal4-Chrimson-in-LexA	EB	feb0916	5
PBG1-8.b-EBw.s-DV_GA.b-to-EBMRA-FB-LT-LT-GA-GA	12C11LexA-60D05Gal4-Chrimson-in-Gal4	EB-in	jun2616	2
PBG1-8.b-EBw.s-DV_GA.b-to-EBMRA-FB-LT-LT-GA-GA	12C11LexA-60D05Gal4-Chrimson-in-Gal4	EB	jun2716	3
PBG1-8.b-EBw.s-DV_GA.b-to-EBMRA-FB-LT-LT-GA-GA	12C11LexA-60D05Gal4-Chrimson-in-Gal4	EB-in	jun2716	2
PBG1-8.b-EBw.s-DV_GA.b-to-EBMRA-FB-LT-LT-GA-GA	12C11LexA-60D05Gal4-Chrimson-in-Gal4	EB-in	jun2816	6
PBG1-8.b-EBw.s-DV_GA.b-to-EBMRA-FB-LT-LT-GA-GA	12C11LexA-60D05Gal4-Chrimson-in-Gal4	BU	jun2816
PBG1-8.b-EBw.s-DV_GA.b-to-EBMRA-FB-LT-LT-GA-GA	12C11LexA-60D05Gal4-Chrimson-in-Gal4	EB	jun2916	2
PBG1-8.b-EBw.s-DV_GA.b-to-EBMRA-FB-LT-LT-GA-GA	12C11LexA-60D05Gal4-Chrimson-in-Gal4	EB-in	jun2916	2
PBG1-8.b-EBw.s-DV_GA.b-to-EBORP O-I-GA-Bulb	60D05LexA-18A05Gal4-Chrimson-in-LexA	Gall	jun1316	5
PBG1-8.b-EBw.s-DV_GA.b-to-EBORP O-I-GA-Bulb	60D05LexA-18A05Gal4-Chrimson-in-LexA	Gall	jun1316	4
PBG1-8.b-EBw.s-DV_GA.b-to-EBORP O-I-GA-Bulb	60D05LexA-18A05Gal4-Chrimson-in-LexA	Gall	jun1316	3
PBG1-8.b-EBw.s-DV_GA.b-to-EBORP O-I-GA-Bulb	60D05LexA-18A05Gal4-Chrimson-in-LexA	Gall	jun1316	2
PBG1-8.b-EBw.s-DV_GA.b-to-EBORP O-I-GA-Bulb	60D05LexA-18A05Gal4-Chrimson-in-LexA	LAL	jun1316	1
PBG1-8.b-EBw.s-DV_GA.b-to-EBORP O-I-GA-Bulb	60D05LexA-18A05Gal4-Chrimson-in-LexA	Gall	jun1416	7
PBG1-8.b-EBw.s-DV_GA.b-to-EBORP O-I-GA-Bulb	60D05LexA-18A05Gal4-Chrimson-in-LexA	Gall	mar0916	3
PBG1-8.b-EBw.s-DV_GA.b-to-EBORP O-I-GA-Bulb	60D05LexA-18A05Gal4-Chrimson-in-LexA	Gall	mar0916	2
PBG1-8.b-EBw.s-DV_GA.b-to-EBORP O-I-GA-Bulb	60D05LexA-18A05Gal4-Chrimson-in-LexA	LAL	mar0916	1
PBG1-8.b-EBw.s-DV_GA.b-to-LAL-Cre	60D05LexA-31A11Gal4-Chrimson-in-LexA	LAL	dec2315	2
PBG1-8.b-EBw.s-DV_GA.b-to-LAL-Cre	60D05LexA-31A11Gal4-Chrimson-in-LexA	LAL	dec2315	1
PBG1-8.b-EBw.s-DV_GA.b-to-LAL-Cre	60D05LexA-31A11Gal4-Chrimson-in-LexA	LAL	dec2815	8
PBG1-8.b-EBw.s-DV_GA.b-to-LAL-Cre	60D05LexA-31A11Gal4-Chrimson-in-LexA	LAL	dec2815	2
PBG1-8.b-EBw.s-DV_GA.b-to-LAL-Cre	60D05LexA-31A11Gal4-Chrimson-in-LexA	LAL	dec2815	1
PBG1-8.b-EBw.s-DV_GA.b-to-LAL-Cre	60D05LexA-31A11Gal4-Chrimson-in-LexA	LAL	dec2915	1
PBG1-8.b-EBw.s-DV_GA.b-to-LAL-Cre	60D05LexA-31A11Gal4-Chrimson-in-LexA	LAL	jul1216	6
PBG1-8.b-EBw.s-DV_GA.b-to-LAL-Cre	60D05LexA-31A11Gal4-Chrimson-in-LexA	LAL	jul1216	5
PBG1-8.b-EBw.s-DV_GA.b-to-LAL-Cre	60D05LexA-31A11Gal4-Chrimson-in-LexA	LAL	jul1216	3
PBG1-8.b-EBw.s-DV_GA.b-to-LAL.s-GAi.s-NO1i.b	60D05LexA-76E11Gal4-Chrimson-in-LexA	LAL	jun1716	4
PBG1-8.b-EBw.s-DV_GA.b-to-LAL.s-GAi.s-NO1i.b	60D05LexA-76E11Gal4-Chrimson-in-LexA	LAL	jun1716	3
PBG1-8.b-EBw.s-DV_GA.b-to-LAL.s-GAi.s-NO1i.b	60D05LexA-76E11Gal4-Chrimson-in-LexA	NO-drug	jun1716	2
PBG1-8.b-EBw.s-DV_GA.b-to-LAL.s-GAi.s-NO1i.b	60D05LexA-76E11Gal4-Chrimson-in-LexA	NO	jun1716	2
PBG1-8.b-EBw.s-DV_GA.b-to-LAL.s-GAi.s-NO1i.b	60D05LexA-76E11Gal4-Chrimson-in-LexA	NO	jun1716	1
PBG1-8.b-EBw.s-DV_GA.b-to-LAL.s-GAi.s-NO1i.b	60D05LexA-76E11Gal4-Chrimson-in-LexA	NO	jun1916	4
PBG1-8.b-EBw.s-DV_GA.b-to-LAL.s-GAi.s-NO1i.b	60D05LexA-76E11Gal4-Chrimson-in-LexA	NO	nov2315	3
PBG1-8.b-EBw.s-DV_GA.b-to-LAL.s-GAi.s-NO1i.b	60D05LexA-76E11Gal4-Chrimson-in-LexA	LAL	nov2315	3
PBG1-8.b-EBw.s-DV_GA.b-to-PB18.s-GxΔ7Gy.b-PB18.s-9i1i8c.b	60D05LexA-55G08Gal4-Chrimson-in-LexA	PB-in	apr1216	1
PBG1-8.b-EBw.s-DV_GA.b-to-PB18.s-GxΔ7Gy.b-PB18.s-9i1i8c.b	60D05LexA-55G08Gal4-Chrimson-in-LexA	PB-in	apr1316	1
PBG1-8.b-EBw.s-DV_GA.b-to-PB18.s-GxΔ7Gy.b-PB18.s-9i1i8c.b	55G08LexA-60D05Gal4-Chrimson-in-Gal4	PB-in	feb1916	3
PBG1-8.b-EBw.s-DV_GA.b-to-PB18.s-GxΔ7Gy.b-PB18.s-9i1i8c.b	55G08LexA-60D05Gal4-Chrimson-in-Gal4	PB-in	feb2216	3
PBG1-8.b-EBw.s-DV_GA.b-to-PB18.s-GxΔ7Gy.b-PB18.s-9i1i8c.b	55G08LexA-60D05Gal4-Chrimson-in-Gal4	PB-in	feb2216	2
PBG1-8.b-EBw.s-DV_GA.b-to-PB18.s-GxΔ7Gy.b-PB18.s-9i1i8c.b	55G08LexA-60D05Gal4-Chrimson-in-Gal4	PB-in	feb2216	1
PBG1-8.b-EBw.s-DV_GA.b-to-PB18.s-GxΔ7Gy.b-PB18.s-9i1i8c.b	55G08LexA-60D05Gal4-Chrimson-in-Gal4	PB-in	feb2316	2
PBG1-8.b-EBw.s-DV_GA.b-to-PB18.s-GxΔ7Gy.b-PB18.s-9i1i8c.b	55G08LexA-60D05Gal4-Chrimson-in-Gal4	PB-in	feb2316	1
PBG1-8.b-EBw.s-DV_GA.b-to-PBG1-7.s-FBl2.s-LAL.b-cre.b	60D05LexA-84H05Gal4-Chrimson-in-LexA	PB-out	jan2116	3
PBG1-8.b-EBw.s-DV_GA.b-to-PBG1-7.s-FBl2.s-LAL.b-cre.b	60D05LexA-84H05Gal4-Chrimson-in-LexA	PB-out	jan2716	5
PBG1-8.b-EBw.s-DV_GA.b-to-PBG1-7.s-FBl2.s-LAL.b-cre.b	60D05LexA-84H05Gal4-Chrimson-in-LexA	PB-out	jan2716	4
PBG1-8.b-EBw.s-DV_GA.b-to-PBG1-7.s-FBl2.s-LAL.b-cre.b	60D05LexA-84H05Gal4-Chrimson-in-LexA	PB-out	jan2716	1
PBG1-8.b-EBw.s-DV_GA.b-to-PBG1-7.s-FBl2.s-LAL.b-cre.b	60D05LexA-84H05Gal4-Chrimson-in-LexA	PB-out	jan2916	2
PBG1-8.b-EBw.s-DV_GA.b-to-PBG1-7.s-FBl2.s-LAL.b-cre.b	60D05LexA-84H05Gal4-Chrimson-in-LexA	PB-out	jan2916	1
PBG1-8.b-EBw.s-DV_GA.b-to-PBG1-8.b-EBw.s-DV_GA.b	60D05LexA-60D05Gal4-Chrimson-in-Gal4	PB	jul0516	8
PBG1-8.b-EBw.s-DV_GA.b-to-PBG1-8.b-EBw.s-DV_GA.b	60D05LexA-60D05Gal4-Chrimson-in-Gal4	Gall	jul0516	6
PBG1-8.b-EBw.s-DV_GA.b-to-PBG1-8.b-EBw.s-DV_GA.b	60D05LexA-60D05Gal4-Chrimson-in-Gal4	Gall	jul0516	5
PBG1-8.b-EBw.s-DV_GA.b-to-PBG1-8.b-EBw.s-DV_GA.b	60D05LexA-60D05Gal4-Chrimson-in-Gal4	PB	jul0616	4
PBG1-8.b-EBw.s-DV_GA.b-to-PBG1-8.b-EBw.s-DV_GA.b	60D05LexA-60D05Gal4-Chrimson-in-Gal4	Gall	jul0616	3
PBG1-8.b-EBw.s-DV_GA.b-to-PBG1-8.b-EBw.s-DV_GA.b	60D05LexA-60D05Gal4-Chrimson-in-Gal4	PB	jul0716	8
PBG1-8.b-EBw.s-DV_GA.b-to-PBG1-8.b-EBw.s-DV_GA.b	60D05LexA-60D05Gal4-Chrimson-in-LexA	PB	jun1416	5
PBG1-8.b-EBw.s-DV_GA.b-to-PBG1-8.b-EBw.s-DV_GA.b	60D05LexA-60D05Gal4-Chrimson-in-LexA	Gall	jun1416	4
PBG1-8.b-EBw.s-DV_GA.b-to-PBG1-8.b-EBw.s-DV_GA.b	60D05LexA-60D05Gal4-Chrimson-in-LexA	Gall	jun1416	3
PBG1-8.b-EBw.s-DV_GA.b-to-PBG1-8.b-EBw.s-DV_GA.b	60D05LexA-60D05Gal4-Chrimson-in-LexA	PB	jun1516	3
PBG1-8.b-EBw.s-DV_GA.b-to-PBG1-8.b-EBw.s-DV_GA.b	60D05LexA-60D05Gal4-Chrimson-in-LexA	PB	jun1516	2
PBG1-8.b-EBw.s-DV_GA.b-to-PBG1-8.b-EBw.s-DV_GA.b	60D05LexA-60D05Gal4-Chrimson-in-LexA	Gall	jun1516	1
PBG1-8.b-EBw.s-DV_GA.b-to-PBG2-9.b-IB.s.SPS.s	60D05LexA-47G08Gal4-Chrimson-in-LexA	PB-in	jan1516	1
PBG1-8.b-EBw.s-DV_GA.b-to-PBG2-9.b-IB.s.SPS.s	60D05LexA-47G08Gal4-Chrimson-in-LexA	PB-in	jan1616	4
PBG1-8.b-EBw.s-DV_GA.b-to-PBG2-9.b-IB.s.SPS.s	60D05LexA-47G08Gal4-Chrimson-in-LexA	PB-in	jan1616	3
PBG1-8.b-EBw.s-DV_GA.b-to-PBG2-9.b-IB.s.SPS.s	60D05LexA-47G08Gal4-Chrimson-in-LexA	PB-in	jan1616	2
PBG1-8.b-EBw.s-DV_GA.b-to-PBG2-9.b-IB.s.SPS.s	60D05LexA-47G08Gal4-Chrimson-in-LexA	PB-in	jan1616	1
PBG1-8.b-EBw.s-DV_GA.b-to-PBG2-9.b-IB.s.SPS.s	47G08LexA-60D05Gal4-Chrimson-in-Gal4	PB-in	nov2315	5
PBG1-8.b-EBw.s-DV_GA.b-to-PBG2-9.s-EBt.b-NO1.b.Type1	60D05LexA-VT008135Gal4-Chrimson-in-LexA	NO	dec2116	1
PBG1-8.b-EBw.s-DV_GA.b-to-PBG2-9.s-EBt.b-NO1.b.Type1	60D05LexA-VT008135Gal4-Chrimson-in-LexA	NO	feb0717	5
PBG1-8.b-EBw.s-DV_GA.b-to-PBG2-9.s-EBt.b-NO1.b.Type1	60D05LexA-VT008135Gal4-Chrimson-in-LexA	NO	feb0717	4
PBG1-8.b-EBw.s-DV_GA.b-to-PBG2-9.s-EBt.b-NO1.b.Type1	60D05LexA-VT008135Gal4-Chrimson-in-LexA	NO	feb0717	3
PBG1-8.b-EBw.s-DV_GA.b-to-PBG2-9.s-EBt.b-NO1.b.Type1	60D05LexA-VT008135Gal4-Chrimson-in-LexA	NO	feb0717	2
PBG1-8.b-EBw.s-DV_GA.b-to-PBG2-9.s-EBt.b-NO1.b.Type1	60D05LexA-VT008135Gal4-Chrimson-in-LexA	NO	feb0717	1
PBG1-8.b-EBw.s-DV_GA.b-to-PBG2-9.s-EBt.b-NO1.b.Type1	60D05LexA-37F06Gal4-Chrimson-in-LexA	NO	jan1816	2
PBG1-8.b-EBw.s-DV_GA.b-to-PBG2-9.s-EBt.b-NO1.b.Type1	60D05LexA-37F06Gal4-Chrimson-in-LexA	NO	jan1816	1
PBG1-8.b-EBw.s-DV_GA.b-to-PBG2-9.s-EBt.b-NO1.b.Type1	60D05LexA-37F06Gal4-Chrimson-in-LexA	NO	jan1916	5
PBG1-8.b-EBw.s-DV_GA.b-to-PBG2-9.s-EBt.b-NO1.b.Type1	60D05LexA-37F06Gal4-Chrimson-in-LexA	NO	jan1916	2
PBG1-8.b-EBw.s-DV_GA.b-to-PBG2-9.s-EBt.b-NO1.b.Type1	60D05LexA-37F06Gal4-Chrimson-in-LexA	NO	jan1916	1
PBG1-8.b-EBw.s-DV_GA.b-to-PBG2-9.s-EBt.b-NO1.b.Type1	60D05LexA-37F06Gal4-Chrimson-in-LexA	NO	nov2315	4
PBG1-8.b-EBw.s-DV_GA.b-to-PBG2-9.s-FBl1.b-NO3PM.b	60D05LexA-85H06Gal4-Chrimson-in-LexA	NO	dec0115	1
PBG1-8.b-EBw.s-DV_GA.b-to-PBG2-9.s-FBl1.b-NO3PM.b	60D05LexA-85H06Gal4-Chrimson-in-LexA	NO	dec0215	2
PBG1-8.b-EBw.s-DV_GA.b-to-PBG2-9.s-FBl1.b-NO3PM.b	60D05LexA-85H06Gal4-Chrimson-in-LexA	NO	dec0215	1
PBG1-8.b-EBw.s-DV_GA.b-to-PBG2-9.s-FBl1.b-NO3PM.b	60D05LexA-85H06Gal4-Chrimson-in-LexA	NO	nov0315	3
PBG1-8.b-EBw.s-DV_GA.b-to-PBG2-9.s-FBl1.b-NO3PM.b	60D05LexA-85H06Gal4-Chrimson-in-LexA	NO	nov0315	2
PBG1-8.b-EBw.s-DV_GA.b-to-PBG2-9.s-FBl1.b-NO3PM.b	60D05LexA-85H06Gal4-Chrimson-in-LexA	NO	nov0415	3
PBG1-8.b-EBw.s-DV_GA.b-to-PBG2-9.s-FBl3.b-NO2D.b	60D05LexA-87G07Gal4-Chrimson-in-LexA	FB	jun2716	4
PBG1-8.b-EBw.s-DV_GA.b-to-PBG2-9.s-FBl3.b-NO2D.b	60D05LexA-87G07Gal4-Chrimson-in-LexA	FB	jun2916	7
PBG1-8.b-EBw.s-DV_GA.b-to-PBG2-9.s-FBl3.b-NO2D.b	60D05LexA-87G07Gal4-Chrimson-in-LexA	NO	jun2916	7
PBG1-8.b-EBw.s-DV_GA.b-to-PBG2-9.s-FBl3.b-NO2D.b	60D05LexA-87G07Gal4-Chrimson-in-LexA	FB	jun2916	6
PBG1-8.b-EBw.s-DV_GA.b-to-PBG2-9.s-FBl3.b-NO2D.b	60D05LexA-87G07Gal4-Chrimson-in-LexA	NO	jun2916	6
PBG1-8.b-EBw.s-DV_GA.b-to-PBG2-9.s-FBl3.b-NO2D.b	60D05LexA-87G07Gal4-Chrimson-in-LexA	NO	nov1215	2
PBG1-8.b-EBw.s-DV_GA.b-to-PBG2-9.s-FBl3.b-NO2D.b	60D05LexA-87G07Gal4-Chrimson-in-LexA	NO	nov1815	2
PBG1-8.b-EBw.s-DV_GA.b-to-PBG2-9.s-FBl3.b-NO2D.b	60D05LexA-87G07Gal4-Chrimson-in-LexA	NO	nov1815	1
PBG1-8.b-EBw.s-DV_GA.b-to-PBG2-9.s-FBl3.b-NO2V.b	67D09LexA-60D05Gal4-Chrimson-in-Gal4	FB	jul1116	5
PBG1-8.b-EBw.s-DV_GA.b-to-PBG2-9.s-FBl3.b-NO2V.b	67D09LexA-60D05Gal4-Chrimson-in-Gal4	FB	may1216	8
PBG1-8.b-EBw.s-DV_GA.b-to-PBG2-9.s-FBl3.b-NO2V.b	67D09LexA-60D05Gal4-Chrimson-in-Gal4	FB	may1216	7
PBG1-8.b-EBw.s-DV_GA.b-to-PBG2-9.s-FBl3.b-NO2V.b	67D09LexA-60D05Gal4-Chrimson-in-Gal4	FB	may1216	6
PBG1-8.b-EBw.s-DV_GA.b-to-PBG2-9.s-FBl3.b-NO2V.b	67D09LexA-60D05Gal4-Chrimson-in-Gal4	FB	may1216	5
PBG1-8.b-EBw.s-DV_GA.b-to-PBG2-9.s-FBl3.b-NO2V.b	67D09LexA-60D05Gal4-Chrimson-in-Gal4	FB	may1316	1
PBG1-8.s-EBt.b-DV_GA.b-to-EBORP O-I-GA-Bulb	18A05-VK22LexA-SS02191Gal4-Chrimson-in-Gal4	Gall	jun1217	5
PBG1-8.s-EBt.b-DV_GA.b-to-EBORP O-I-GA-Bulb	18A05-VK22LexA-SS02191Gal4-Chrimson-in-Gal4	Gall	jun1217	4
PBG1-8.s-EBt.b-DV_GA.b-to-EBORP O-I-GA-Bulb	18A05-VK22LexA-SS02191Gal4-Chrimson-in-Gal4	Gall	jun1317	4
PBG1-8.s-EBt.b-DV_GA.b-to-EBORP O-I-GA-Bulb	18A05-VK22LexA-SS02191Gal4-Chrimson-in-Gal4	Gall	jun1317	3
PBG1-8.s-EBt.b-DV_GA.b-to-EBORP O-I-GA-Bulb	18A05-VK22LexA-SS02191Gal4-Chrimson-in-Gal4	Gall	jun1317	2
PBG1-8.s-EBt.b-DV_GA.b-to-EBORP O-I-GA-Bulb	18A05-VK22LexA-SS02191Gal4-Chrimson-in-Gal4	Gall	jun1317	1
PBG1-8.s-EBt.b-DV_GA.b-to-LAL.s-GAi.s-NO1i.b	76E11-VK22LexA-SS02191Gal4-Chrimson-in-Gal4	NO	jul1917	2
PBG1-8.s-EBt.b-DV_GA.b-to-LAL.s-GAi.s-NO1i.b	76E11-VK22LexA-SS02191Gal4-Chrimson-in-Gal4	NO	jul1917	1
PBG1-8.s-EBt.b-DV_GA.b-to-PBG2-9.s-EBt.b-NO1.b.Type1	37F06-VK22LexA-SS02191Gal4-Chrimson-in-Gal4	NO	apr0317	4
PBG1-8.s-EBt.b-DV_GA.b-to-PBG2-9.s-EBt.b-NO1.b.Type1	37F06-VK22LexA-SS02191Gal4-Chrimson-in-Gal4	NO	apr0317	3
PBG1-8.s-EBt.b-DV_GA.b-to-PBG2-9.s-EBt.b-NO1.b.Type1	37F06-VK22LexA-SS02191Gal4-Chrimson-in-Gal4	NO	apr0317	2
PBG1-8.s-EBt.b-DV_GA.b-to-PBG2-9.s-EBt.b-NO1.b.Type1	37F06-VK22LexA-SS02191Gal4-Chrimson-in-Gal4	NO	apr0317	1
PBG2-9.b-IB.s.SPS.s-to-PB18.s-GxΔ7Gy.b-PB18.s-9i1i8c.b	47G08LexA-55G08Gal4-Chrimson-in-LexA	PB-in	dec2315	3
PBG2-9.b-IB.s.SPS.s-to-PB18.s-GxΔ7Gy.b-PB18.s-9i1i8c.b	47G08LexA-55G08Gal4-Chrimson-in-LexA	PB-in	dec2415	1
PBG2-9.b-IB.s.SPS.s-to-PB18.s-GxΔ7Gy.b-PB18.s-9i1i8c.b	47G08LexA-55G08Gal4-Chrimson-in-LexA	PB-in	dec2815	7
PBG2-9.b-IB.s.SPS.s-to-PB18.s-GxΔ7Gy.b-PB18.s-9i1i8c.b	47G08LexA-55G08Gal4-Chrimson-in-LexA	PB-in	dec2815	6
PBG2-9.b-IB.s.SPS.s-to-PB18.s-GxΔ7Gy.b-PB18.s-9i1i8c.b	47G08LexA-55G08Gal4-Chrimson-in-LexA	PB-in	dec2815	5
PBG2-9.b-IB.s.SPS.s-to-PB18.s-GxΔ7Gy.b-PB18.s-9i1i8c.b	47G08LexA-55G08Gal4-Chrimson-in-LexA	PB-in	dec2915	4
PBG2-9.b-IB.s.SPS.s-to-PB18.s-GxΔ7Gy.b-PB18.s-9i1i8c.b	47G08LexA-55G08Gal4-Chrimson-in-LexA	PB-in	dec3015	3
PBG2-9.b-IB.s.SPS.s-to-PBG1-7.s-FBl2.s-LAL.b-cre.b	84H05LexA-47G08Gal4-Chrimson-in-Gal4	FB-in	dec0915	2
PBG2-9.b-IB.s.SPS.s-to-PBG1-7.s-FBl2.s-LAL.b-cre.b	84H05LexA-47G08Gal4-Chrimson-in-Gal4	FB-in	dec1015	2
PBG2-9.b-IB.s.SPS.s-to-PBG1-7.s-FBl2.s-LAL.b-cre.b	84H05LexA-47G08Gal4-Chrimson-in-Gal4	FB-in	dec1015	1
PBG2-9.b-IB.s.SPS.s-to-PBG1-7.s-FBl2.s-LAL.b-cre.b	84H05LexA-47G08Gal4-Chrimson-in-Gal4	FB-in	dec1415	3
PBG2-9.b-IB.s.SPS.s-to-PBG1-7.s-FBl2.s-LAL.b-cre.b	84H05LexA-47G08Gal4-Chrimson-in-Gal4	FB-in	dec1415	1
PBG2-9.b-IB.s.SPS.s-to-PBG1-7.s-FBl2.s-LAL.b-cre.b	84H05LexA-47G08Gal4-Chrimson-in-Gal4	FB-in	dec1515	3
PBG2-9.b-IB.s.SPS.s-to-PBG1-8.b-EBw.s-DV_GA.b	60D05LexA-47G08Gal4-Chrimson-in-Gal4	EB	dec0315	3
PBG2-9.b-IB.s.SPS.s-to-PBG1-8.b-EBw.s-DV_GA.b	60D05LexA-47G08Gal4-Chrimson-in-Gal4	EB	dec0315	2
PBG2-9.b-IB.s.SPS.s-to-PBG1-8.b-EBw.s-DV_GA.b	60D05LexA-47G08Gal4-Chrimson-in-Gal4	EB	dec0315	1
PBG2-9.b-IB.s.SPS.s-to-PBG1-8.b-EBw.s-DV_GA.b	60D05LexA-47G08Gal4-Chrimson-in-Gal4	EB	nov0415	2
PBG2-9.b-IB.s.SPS.s-to-PBG1-8.b-EBw.s-DV_GA.b	60D05LexA-47G08Gal4-Chrimson-in-Gal4	EB	nov0415	1
PBG2-9.b-IB.s.SPS.s-to-PBG2-9.s-EBt.b-NO1.b.Type1	47G08LexA-37F06Gal4-Chrimson-in-LexA	EB	dec0915	5
PBG2-9.b-IB.s.SPS.s-to-PBG2-9.s-EBt.b-NO1.b.Type1	47G08LexA-37F06Gal4-Chrimson-in-LexA	EB	dec0915	1
PBG2-9.b-IB.s.SPS.s-to-PBG2-9.s-EBt.b-NO1.b.Type1	47G08LexA-37F06Gal4-Chrimson-in-LexA	EB	dec1115	2
PBG2-9.b-IB.s.SPS.s-to-PBG2-9.s-EBt.b-NO1.b.Type1	47G08LexA-37F06Gal4-Chrimson-in-LexA	EB	dec1115	1
PBG2-9.b-IB.s.SPS.s-to-PBG2-9.s-EBt.b-NO1.b.Type1	47G08LexA-37F06Gal4-Chrimson-in-LexA	EB	dec1415	4
PBG2-9.b-IB.s.SPS.s-to-PBG2-9.s-EBt.b-NO1.b.Type1	47G08LexA-37F06Gal4-Chrimson-in-LexA	EB	dec1515	2
PBG2-9.b-IB.s.SPS.s-to-PBG2-9.s-FBl1.b-NO3PM.b	47G08LexA-85H06Gal4-Chrimson-in-LexA	FB	feb0116	2
PBG2-9.b-IB.s.SPS.s-to-PBG2-9.s-FBl1.b-NO3PM.b	47G08LexA-85H06Gal4-Chrimson-in-LexA	FB	feb0116	1
PBG2-9.b-IB.s.SPS.s-to-PBG2-9.s-FBl1.b-NO3PM.b	47G08LexA-85H06Gal4-Chrimson-in-LexA	FB	jan2116	2
PBG2-9.b-IB.s.SPS.s-to-PBG2-9.s-FBl1.b-NO3PM.b	47G08LexA-85H06Gal4-Chrimson-in-LexA	FB	jan2116	1
PBG2-9.b-IB.s.SPS.s-to-PBG2-9.s-FBl1.b-NO3PM.b	47G08LexA-85H06Gal4-Chrimson-in-LexA	FB	jan2816	4
PBG2-9.b-IB.s.SPS.s-to-PBG2-9.s-FBl3.b-NO2D.b	47G08LexA-87G07Gal4-Chrimson-in-LexA	FB	jan0816	4
PBG2-9.b-IB.s.SPS.s-to-PBG2-9.s-FBl3.b-NO2D.b	47G08LexA-87G07Gal4-Chrimson-in-LexA	FB	jan0816	3
PBG2-9.b-IB.s.SPS.s-to-PBG2-9.s-FBl3.b-NO2D.b	47G08LexA-87G07Gal4-Chrimson-in-LexA	FB	jan0816	1
PBG2-9.b-IB.s.SPS.s-to-PBG2-9.s-FBl3.b-NO2D.b	47G08LexA-87G07Gal4-Chrimson-in-LexA	FB	jan1516	3
PBG2-9.b-IB.s.SPS.s-to-PBG2-9.s-FBl3.b-NO2D.b	47G08LexA-87G07Gal4-Chrimson-in-LexA	FB	jan1516	2
PBG2-9.b-IB.s.SPS.s-to-PBG2-9.s-FBl3.b-NO2D.b	47G08LexA-87G07Gal4-Chrimson-in-LexA	FB	nov2315	2
PBG2-9.b-IB.s.SPS.s-to-PBG2-9.s-FBl3.b-NO2V.b	67D09LexA-47G08Gal4-Chrimson-in-Gal4	FB	feb0516	5
PBG2-9.b-IB.s.SPS.s-to-PBG2-9.s-FBl3.b-NO2V.b	67D09LexA-47G08Gal4-Chrimson-in-Gal4	FB	feb0816	2
PBG2-9.b-IB.s.SPS.s-to-PBG2-9.s-FBl3.b-NO2V.b	67D09LexA-47G08Gal4-Chrimson-in-Gal4	FB	feb0816	1
PBG2-9.b-IB.s.SPS.s-to-PBG2-9.s-FBl3.b-NO2V.b	67D09LexA-47G08Gal4-Chrimson-in-Gal4	FB	feb0916	7
PBG2-9.b-IB.s.SPS.s-to-PBG2-9.s-FBl3.b-NO2V.b	67D09LexA-47G08Gal4-Chrimson-in-Gal4	FB-in	feb0916	2
PBG2-9.b-IB.s.SPS.s-to-PBG2-9.s-FBl3.b-NO2V.b	67D09LexA-47G08Gal4-Chrimson-in-Gal4	FB	feb0916	1
PBG2-9.s-EBt.b-NO1.b.Type1-to-LAL.s-GAi.s-NO1i.b	37F06LexA-76E11Gal4-Chrimson-in-LexA	LAL	feb0116	5
PBG2-9.s-EBt.b-NO1.b.Type1-to-LAL.s-GAi.s-NO1i.b	37F06LexA-76E11Gal4-Chrimson-in-LexA	LAL	feb0116	4
PBG2-9.s-EBt.b-NO1.b.Type1-to-LAL.s-GAi.s-NO1i.b	37F06LexA-76E11Gal4-Chrimson-in-LexA	LAL	jan2716	3
PBG2-9.s-EBt.b-NO1.b.Type1-to-LAL.s-GAi.s-NO1i.b	37F06LexA-76E11Gal4-Chrimson-in-LexA	LAL	jan2716	2
PBG2-9.s-EBt.b-NO1.b.Type1-to-LAL.s-GAi.s-NO1i.b	37F06LexA-76E11Gal4-Chrimson-in-LexA	LAL	jan2816	5
PBG2-9.s-EBt.b-NO1.b.Type1-to-LAL.s-GAi.s-NO1i.b	37F06LexA-76E11Gal4-Chrimson-in-LexA	LAL	jan2916	3
PBG2-9.s-EBt.b-NO1.b.Type1-to-PBG1-8.b-EBw.s-DV_GA.b	60D05LexA-VT008135Gal4-Chrimson-in-Gal4	Gall	dec2016	1
PBG2-9.s-EBt.b-NO1.b.Type1-to-PBG1-8.b-EBw.s-DV_GA.b	60D05LexA-VT008135Gal4-Chrimson-in-Gal4	Gall	dec2116	2
PBG2-9.s-EBt.b-NO1.b.Type1-to-PBG1-8.b-EBw.s-DV_GA.b	60D05LexA-37F06Gal4-Chrimson-in-Gal4	Gall	feb2916	3
PBG2-9.s-EBt.b-NO1.b.Type1-to-PBG1-8.b-EBw.s-DV_GA.b	60D05LexA-37F06Gal4-Chrimson-in-Gal4	Gall	feb2916	2
PBG2-9.s-EBt.b-NO1.b.Type1-to-PBG1-8.b-EBw.s-DV_GA.b	60D05LexA-37F06Gal4-Chrimson-in-Gal4	Gall	feb2916	1
PBG2-9.s-EBt.b-NO1.b.Type1-to-PBG1-8.b-EBw.s-DV_GA.b	60D05LexA-37F06Gal4-Chrimson-in-Gal4	Gall	mar0116	1
PBG2-9.s-EBt.b-NO1.b.Type1-to-PBG1-8.b-EBw.s-DV_GA.b	60D05LexA-37F06Gal4-Chrimson-in-Gal4	Gall	mar0216	2
PBG2-9.s-EBt.b-NO1.b.Type1-to-PBG1-8.b-EBw.s-DV_GA.b	60D05LexA-37F06Gal4-Chrimson-in-Gal4	Gall	mar0216	1
PBG2-9.s-EBt.b-NO1.b.Type1-to-PBG1-8.s-EBt.b-DV_GA.b	37F06-VK22LexA-SS02191Gal4-Chrimson-in-LexA	Gall	jun0117	2
PBG2-9.s-EBt.b-NO1.b.Type1-to-PBG1-8.s-EBt.b-DV_GA.b	37F06-VK22LexA-SS02191Gal4-Chrimson-in-LexA	Gall	jun0117	1
PBG2-9.s-EBt.b-NO1.b.Type1-to-PBG1-8.s-EBt.b-DV_GA.b	37F06-VK22LexA-SS02191Gal4-Chrimson-in-LexA	Gall	may3117	7
PBG2-9.s-EBt.b-NO1.b.Type1-to-PBG1-8.s-EBt.b-DV_GA.b	37F06-VK22LexA-SS02191Gal4-Chrimson-in-LexA	Gall	may3117	6
PBG2-9.s-EBt.b-NO1.b.Type1-to-PBG1-8.s-EBt.b-DV_GA.b	37F06-VK22LexA-SS02191Gal4-Chrimson-in-LexA	Gall	may3117	5
PBG2-9.s-EBt.b-NO1.b.Type1-to-PBG1-8.s-EBt.b-DV_GA.b	37F06-VK22LexA-SS02191Gal4-Chrimson-in-LexA	Gall	may3117	4
PBG2-9.s-EBt.b-NO1.b.Type1-to-PBG2-9.s-EBt.b-NO1.b.Type1	37F06LexA-37F06Gal4-Chrimson-in-LexA	EB	jun1616	7
PBG2-9.s-EBt.b-NO1.b.Type1-to-PBG2-9.s-EBt.b-NO1.b.Type1	37F06LexA-37F06Gal4-Chrimson-in-LexA	EB	jun1616	6
PBG2-9.s-EBt.b-NO1.b.Type1-to-PBG2-9.s-EBt.b-NO1.b.Type1	37F06LexA-37F06Gal4-Chrimson-in-LexA	EB	jun1616	4
PBG2-9.s-EBt.b-NO1.b.Type1-to-PBG2-9.s-EBt.b-NO1.b.Type1	37F06LexA-37F06Gal4-Chrimson-in-LexA	EB	jun2116	5
PBG2-9.s-EBt.b-NO1.b.Type1-to-PBG2-9.s-EBt.b-NO1.b.Type1	37F06LexA-37F06Gal4-Chrimson-in-LexA	EB	jun2116	3
PBG2-9.s-EBt.b-NO1.b.Type1-to-PBG2-9.s-EBt.b-NO1.b.Type1	37F06LexA-37F06Gal4-Chrimson-in-LexA	EB	jun2216	4
PBG2-9.s-EBt.b-NO1.b.Type1-to-PBG2-9.s-EBt.b-NO1.b.Type2	37F06-VK22LexA-SS02232Gal4-Chrimson-in-LexA	NO	jun1317	5
PBG2-9.s-EBt.b-NO1.b.Type1-to-PBG2-9.s-EBt.b-NO1.b.Type2	37F06-VK22LexA-SS02232Gal4-Chrimson-in-LexA	EB	jun1417	5
PBG2-9.s-EBt.b-NO1.b.Type1-to-PBG2-9.s-EBt.b-NO1.b.Type2	37F06-VK22LexA-SS02232Gal4-Chrimson-in-LexA	NO+EB	jun1417	4
PBG2-9.s-EBt.b-NO1.b.Type1-to-PBG2-9.s-EBt.b-NO1.b.Type2	37F06-VK22LexA-SS02232Gal4-Chrimson-in-LexA	NO	jun1417	2
PBG2-9.s-EBt.b-NO1.b.Type1-to-PBG2-9.s-EBt.b-NO1.b.Type2	37F06-VK22LexA-SS02232Gal4-Chrimson-in-LexA	EB	jun1517	7
PBG2-9.s-EBt.b-NO1.b.Type1-to-PBG2-9.s-EBt.b-NO1.b.Type2	37F06-VK22LexA-SS02232Gal4-Chrimson-in-LexA	NO	jun1917	2
PBG2-9.s-EBt.b-NO1.b.Type2-to-PBG2-9.s-EBt.b-NO1.b.Type1	37F06-VK22LexA-SS02232Gal4-Chrimson-in-Gal4	NO	jul0517	3
PBG2-9.s-EBt.b-NO1.b.Type2-to-PBG2-9.s-EBt.b-NO1.b.Type1	37F06-VK22LexA-SS02232Gal4-Chrimson-in-Gal4	NO	jul0517	2
PBG2-9.s-EBt.b-NO1.b.Type2-to-PBG2-9.s-EBt.b-NO1.b.Type1	37F06-VK22LexA-SS02232Gal4-Chrimson-in-Gal4	EB	jul0517	1
PBG2-9.s-EBt.b-NO1.b.Type2-to-PBG2-9.s-EBt.b-NO1.b.Type1	37F06-VK22LexA-SS02232Gal4-Chrimson-in-Gal4	NO	jul0617	2
PBG2-9.s-EBt.b-NO1.b.Type2-to-PBG2-9.s-EBt.b-NO1.b.Type1	37F06-VK22LexA-SS02232Gal4-Chrimson-in-Gal4	NO	jul0617	1
PBG2-9.s-EBt.b-NO1.b.Type2-to-PBG2-9.s-EBt.b-NO1.b.Type1	37F06-VK22LexA-SS02232Gal4-Chrimson-in-Gal4	PB	mar2317	1
PBG2-9.s-FBl1.b-NO3PM.b-to-LAL.s-GAi.s-NO1i.b	85H06LexA-76E11Gal4-Chrimson-in-LexA	LAL	dec3115	4
PBG2-9.s-FBl1.b-NO3PM.b-to-LAL.s-GAi.s-NO1i.b	85H06LexA-76E11Gal4-Chrimson-in-LexA	LAL	dec3115	3
PBG2-9.s-FBl1.b-NO3PM.b-to-LAL.s-GAi.s-NO1i.b	85H06LexA-76E11Gal4-Chrimson-in-LexA	LAL	jan0416	2
PBG2-9.s-FBl1.b-NO3PM.b-to-LAL.s-GAi.s-NO1i.b	85H06LexA-76E11Gal4-Chrimson-in-LexA	LAL	nov1715	1
PBG2-9.s-FBl1.b-NO3PM.b-to-LAL.s-GAi.s-NO1i.b	85H06LexA-76E11Gal4-Chrimson-in-LexA	LAL	nov1815	4
PBG2-9.s-FBl1.b-NO3PM.b-to-LAL.s-GAi.s-NO1i.b	85H06LexA-76E11Gal4-Chrimson-in-LexA	LAL	nov1815	3
PBG2-9.s-FBl1.b-NO3PM.b-to-PBG1-7.s-FBl2.s-LAL.b-cre.b	85H06LexA-84H05Gal4-Chrimson-in-LexA	LAL	jul1916	5
PBG2-9.s-FBl1.b-NO3PM.b-to-PBG1-7.s-FBl2.s-LAL.b-cre.b	85H06LexA-84H05Gal4-Chrimson-in-LexA	LAL	jul1916	4
PBG2-9.s-FBl1.b-NO3PM.b-to-PBG1-7.s-FBl2.s-LAL.b-cre.b	85H06LexA-84H05Gal4-Chrimson-in-LexA	LAL	jul1916	3
PBG2-9.s-FBl1.b-NO3PM.b-to-PBG1-7.s-FBl2.s-LAL.b-cre.b	85H06LexA-84H05Gal4-Chrimson-in-LexA	LAL	jul2016	4
PBG2-9.s-FBl1.b-NO3PM.b-to-PBG1-7.s-FBl2.s-LAL.b-cre.b	85H06LexA-84H05Gal4-Chrimson-in-LexA	LAL	jul2016	3
PBG2-9.s-FBl1.b-NO3PM.b-to-PBG1-7.s-FBl2.s-LAL.b-cre.b	85H06LexA-84H05Gal4-Chrimson-in-LexA	LAL	jul2116	3
PBG2-9.s-FBl3.b-NO2D.b-to-LAL.s-GAi.s-NO1i.b	76E11LexA-87G07Gal4-Chrimson-in-Gal4	LAL	dec0115	2
PBG2-9.s-FBl3.b-NO2D.b-to-LAL.s-GAi.s-NO1i.b	76E11LexA-87G07Gal4-Chrimson-in-Gal4	LAL	nov3015	1
PBG2-9.s-FBl3.b-NO2D.b-to-PBG1-7.s-FBl2.s-LAL.b-cre.b	84H05LexA-87G07Gal4-Chrimson-in-Gal4	LAL	jul1116	7
PBG2-9.s-FBl3.b-NO2D.b-to-PBG1-7.s-FBl2.s-LAL.b-cre.b	84H05LexA-87G07Gal4-Chrimson-in-Gal4	LAL	jul1116	6
PBG2-9.s-FBl3.b-NO2D.b-to-PBG1-7.s-FBl2.s-LAL.b-cre.b	84H05LexA-87G07Gal4-Chrimson-in-Gal4	FB	jul1216	2
PBG2-9.s-FBl3.b-NO2D.b-to-PBG1-7.s-FBl2.s-LAL.b-cre.b	84H05LexA-87G07Gal4-Chrimson-in-Gal4	LAL	jul1216	2
PBG2-9.s-FBl3.b-NO2D.b-to-PBG1-7.s-FBl2.s-LAL.b-cre.b	84H05LexA-87G07Gal4-Chrimson-in-Gal4	LAL	jul1216	1
PBG2-9.s-FBl3.b-NO2D.b-to-PBG1-7.s-FBl2.s-LAL.b-cre.b	84H05LexA-87G07Gal4-Chrimson-in-Gal4	LAL	jul1316	2
PBG2-9.s-FBl3.b-NO2D.b-to-PBG1-7.s-FBl2.s-LAL.b-cre.b	84H05LexA-87G07Gal4-Chrimson-in-Gal4	LAL	jul1316	1
PBG2-9.s-FBl3.b-NO2V.b-to-Cre.s-LAL.s-NO2.b	67D09-attP5LexA-SS04420Gal4-Chrimson-in-LexA	LAL	jul0617	3
PBG2-9.s-FBl3.b-NO2V.b-to-LAL.s-GAi.s-NO1i.b	67D09LexA-76E11Gal4-Chrimson-in-LexA	NO	jul2416	4
PBG2-9.s-FBl3.b-NO2V.b-to-LAL.s-GAi.s-NO1i.b	67D09LexA-76E11Gal4-Chrimson-in-LexA	LAL	jul2416	4
SMP.s-LAL.s-LAL.b.contra-to-LAL-Cre	72H06LexA-31A11Gal4-Chrimson-in-LexA	Crepine	dec0915	4
SMP.s-LAL.s-LAL.b.contra-to-LAL-Cre	72H06LexA-31A11Gal4-Chrimson-in-LexA	Crepine	dec0915	3
SMP.s-LAL.s-LAL.b.contra-to-LAL-Cre	72H06LexA-31A11Gal4-Chrimson-in-LexA	Crepine	dec1015	4
SMP.s-LAL.s-LAL.b.contra-to-LAL-Cre	72H06LexA-31A11Gal4-Chrimson-in-LexA	Crepine	dec1015	3
SMP.s-LAL.s-LAL.b.contra-to-LAL-Cre	72H06LexA-31A11Gal4-Chrimson-in-LexA	Crepine	dec1415	2
SMP.s-LAL.s-LAL.b.contra-to-LAL-Cre	72H06LexA-31A11Gal4-Chrimson-in-LexA	LAL	dec1515	1
SMP.s-LAL.s-LAL.b.contra-to-LAL.s-GAi.s-NO1i.b	76E11LexA-72H06Gal4-Chrimson-in-Gal4	NO	jun1816	4
SMP.s-LAL.s-LAL.b.contra-to-LAL.s-GAi.s-NO1i.b	76E11LexA-72H06Gal4-Chrimson-in-Gal4	NO	jun2316	6
SMP.s-LAL.s-LAL.b.contra-to-LAL.s-GAi.s-NO1i.b	76E11LexA-72H06Gal4-Chrimson-in-Gal4	LAL	jun2316	5
SMP.s-LAL.s-LAL.b.contra-to-LAL.s-GAi.s-NO1i.b	76E11LexA-72H06Gal4-Chrimson-in-Gal4	NO	jun2316	4
SMP.s-LAL.s-LAL.b.contra-to-LAL.s-GAi.s-NO1i.b	76E11LexA-72H06Gal4-Chrimson-in-Gal4	NO	jun2416	2
SMP.s-LAL.s-LAL.b.contra-to-LAL.s-GAi.s-NO1i.b	76E11LexA-72H06Gal4-Chrimson-in-Gal4	LAL	jun2416	1
SMP.s-LAL.s-LAL.b.contra-to-SMP.s-LAL.s-LAL.b.contra	72H06LexA-72H06Gal4-Chrimson-in-Gal4	LAL	jul2016	7
SMP.s-LAL.s-LAL.b.contra-to-SMP.s-LAL.s-LAL.b.contra	72H06LexA-72H06Gal4-Chrimson-in-Gal4	LAL	jul2016	2
SMP.s-LAL.s-LAL.b.contra-to-SMP.s-LAL.s-LAL.b.contra	72H06LexA-72H06Gal4-Chrimson-in-Gal4	LAL	jul2116	2
SMP.s-LAL.s-LAL.b.contra-to-SMP.s-LAL.s-LAL.b.contra	72H06LexA-72H06Gal4-Chrimson-in-Gal4	LAL	jul2116	1
SMP.s-LAL.s-LAL.b.contra-to-SMP.s-LAL.s-LAL.b.contra	72H06LexA-72H06Gal4-Chrimson-in-Gal4	LAL	jul2216	3
SMP.s-LAL.s-LAL.b.contra-to-SMP.s-LAL.s-LAL.b.contra	72H06LexA-72H06Gal4-Chrimson-in-Gal4	LAL	jul2216	1
SMP.s-LAL.s-LAL.b.contra-to-Wedge-LAL.s-LAL.b.contra	72H06LexA-26B07Gal4-Chrimson-in-LexA	LAL	jun1417	3
SMP.s-LAL.s-LAL.b.contra-to-Wedge-LAL.s-LAL.b.contra	72H06LexA-26B07Gal4-Chrimson-in-LexA	LAL	jun1417	1
SMP.s-LAL.s-LAL.b.contra-to-Wedge-LAL.s-LAL.b.contra	72H06LexA-26B07Gal4-Chrimson-in-LexA	LAL	jun1517	6
SMP.s-LAL.s-LAL.b.contra-to-Wedge-LAL.s-LAL.b.contra	72H06LexA-26B07Gal4-Chrimson-in-LexA	LAL	jun1517	5
SMP.s-LAL.s-LAL.b.contra-to-Wedge-LAL.s-LAL.b.contra	72H06LexA-26B07Gal4-Chrimson-in-LexA	LAL	jun1517	4
SMP.s-LAL.s-LAL.b.contra-to-Wedge-LAL.s-LAL.b.contra	72H06LexA-26B07Gal4-Chrimson-in-LexA	LAL	jun1517	3
SPS.s-PB.b-to-PBG1-7.s-FBl2.s-LAL.b-cre.b	84H05-VK22LexA-SS00153Gal4-Chrimson-in-Gal4	PB-out	jan1817	2
SPS.s-PB.b-to-PBG1-7.s-FBl2.s-LAL.b-cre.b	84H05-VK22LexA-SS00153Gal4-Chrimson-in-Gal4	PB-out	jan1817	1
SPS.s-PB.b-to-PBG2-9.s-EBt.b-NO1.b.Type1	37F06-VK22LexA-SS00153Gal4-Chrimson-in-Gal4	EB+NO	jun3017	3
SPS.s-PB.b-to-PBG2-9.s-EBt.b-NO1.b.Type1	37F06-VK22LexA-SS00153Gal4-Chrimson-in-Gal4	EB	jun3017	2
SPS.s-PB.b-to-PBG2-9.s-EBt.b-NO1.b.Type1	37F06-VK22LexA-SS00153Gal4-Chrimson-in-Gal4	EB	jun3017	1
SPS.s-PB.b-to-PBG2-9.s-EBt.b-NO1.b.Type1	37F06-VK22LexA-SS00153Gal4-Chrimson-in-Gal4	EB	mar2317	4
SPS.s-PB.b-to-PBG2-9.s-EBt.b-NO1.b.Type1	37F06-VK22LexA-SS00153Gal4-Chrimson-in-Gal4	EB	mar2317	3
SPS.s-PB.b-to-PBG2-9.s-EBt.b-NO1.b.Type1	37F06-VK22LexA-SS00153Gal4-Chrimson-in-Gal4	EB	mar2317	2
SPS.s-PB.b-to-PBG2-9.s-FBl3.b-NO2V.b	67D09-attP5LexA-SS00153Gal4-Chrimson-in-Gal4	FB	jun2617	4
SPS.s-PB.b-to-PBG2-9.s-FBl3.b-NO2V.b	67D09-attP5LexA-SS00153Gal4-Chrimson-in-Gal4	FB	jun2617	3
SPS.s-PB.b-to-PBG2-9.s-FBl3.b-NO2V.b	67D09-attP5LexA-SS00153Gal4-Chrimson-in-Gal4	FB	jun2717	6
SPS.s-PB.b-to-PBG2-9.s-FBl3.b-NO2V.b	67D09-attP5LexA-SS00153Gal4-Chrimson-in-Gal4	FB	jun2717	5
SPS.s-PB.b-to-PBG2-9.s-FBl3.b-NO2V.b	67D09-attP5LexA-SS00153Gal4-Chrimson-in-Gal4	FB	jun2717	4
SPS.s-PB.b-to-PBG2-9.s-FBl3.b-NO2V.b	67D09-attP5LexA-SS00153Gal4-Chrimson-in-Gal4	FB	jun2717	3
Wedge-LAL.s-LAL.b.contra-to-LAL.s-IMP-FBl3.b	49H05LexA-26B07Gal4-Chrimson-in-Gal4	FB	jul1416	2
Wedge-LAL.s-LAL.b.contra-to-LAL.s-IMP-FBl3.b	49H05LexA-26B07Gal4-Chrimson-in-Gal4	LAL-in	jul1416	1
Wedge-LAL.s-LAL.b.contra-to-LAL.s-IMP-FBl3.b	49H05LexA-26B07Gal4-Chrimson-in-Gal4	FB	jul1416	1
Wedge-LAL.s-LAL.b.contra-to-LAL.s-IMP-FBl3.b	49H05LexA-26B07Gal4-Chrimson-in-Gal4	FB	jul1516	4
Wedge-LAL.s-LAL.b.contra-to-LAL.s-IMP-FBl3.b	49H05LexA-26B07Gal4-Chrimson-in-Gal4	FB	jul1616	6
Wedge-LAL.s-LAL.b.contra-to-LAL.s-IMP-FBl3.b	49H05LexA-26B07Gal4-Chrimson-in-Gal4	LAL-in	jul1616	5
Wedge-LAL.s-LAL.b.contra-to-LAL.s-IMP-FBl3.b	49H05LexA-26B07Gal4-Chrimson-in-Gal4	FB	jul1616	5
Wedge-LAL.s-LAL.b.contra-to-LAL.s-IMP-FBl3.b	49H05LexA-26B07Gal4-Chrimson-in-Gal4	FB	jul1616	4
