# Supplementary figures and images for: Building a functional connectome of the Drosophila central complex
Source: eLife journal article supplement (doi:10.7554/elife.37017), 2018-08-20

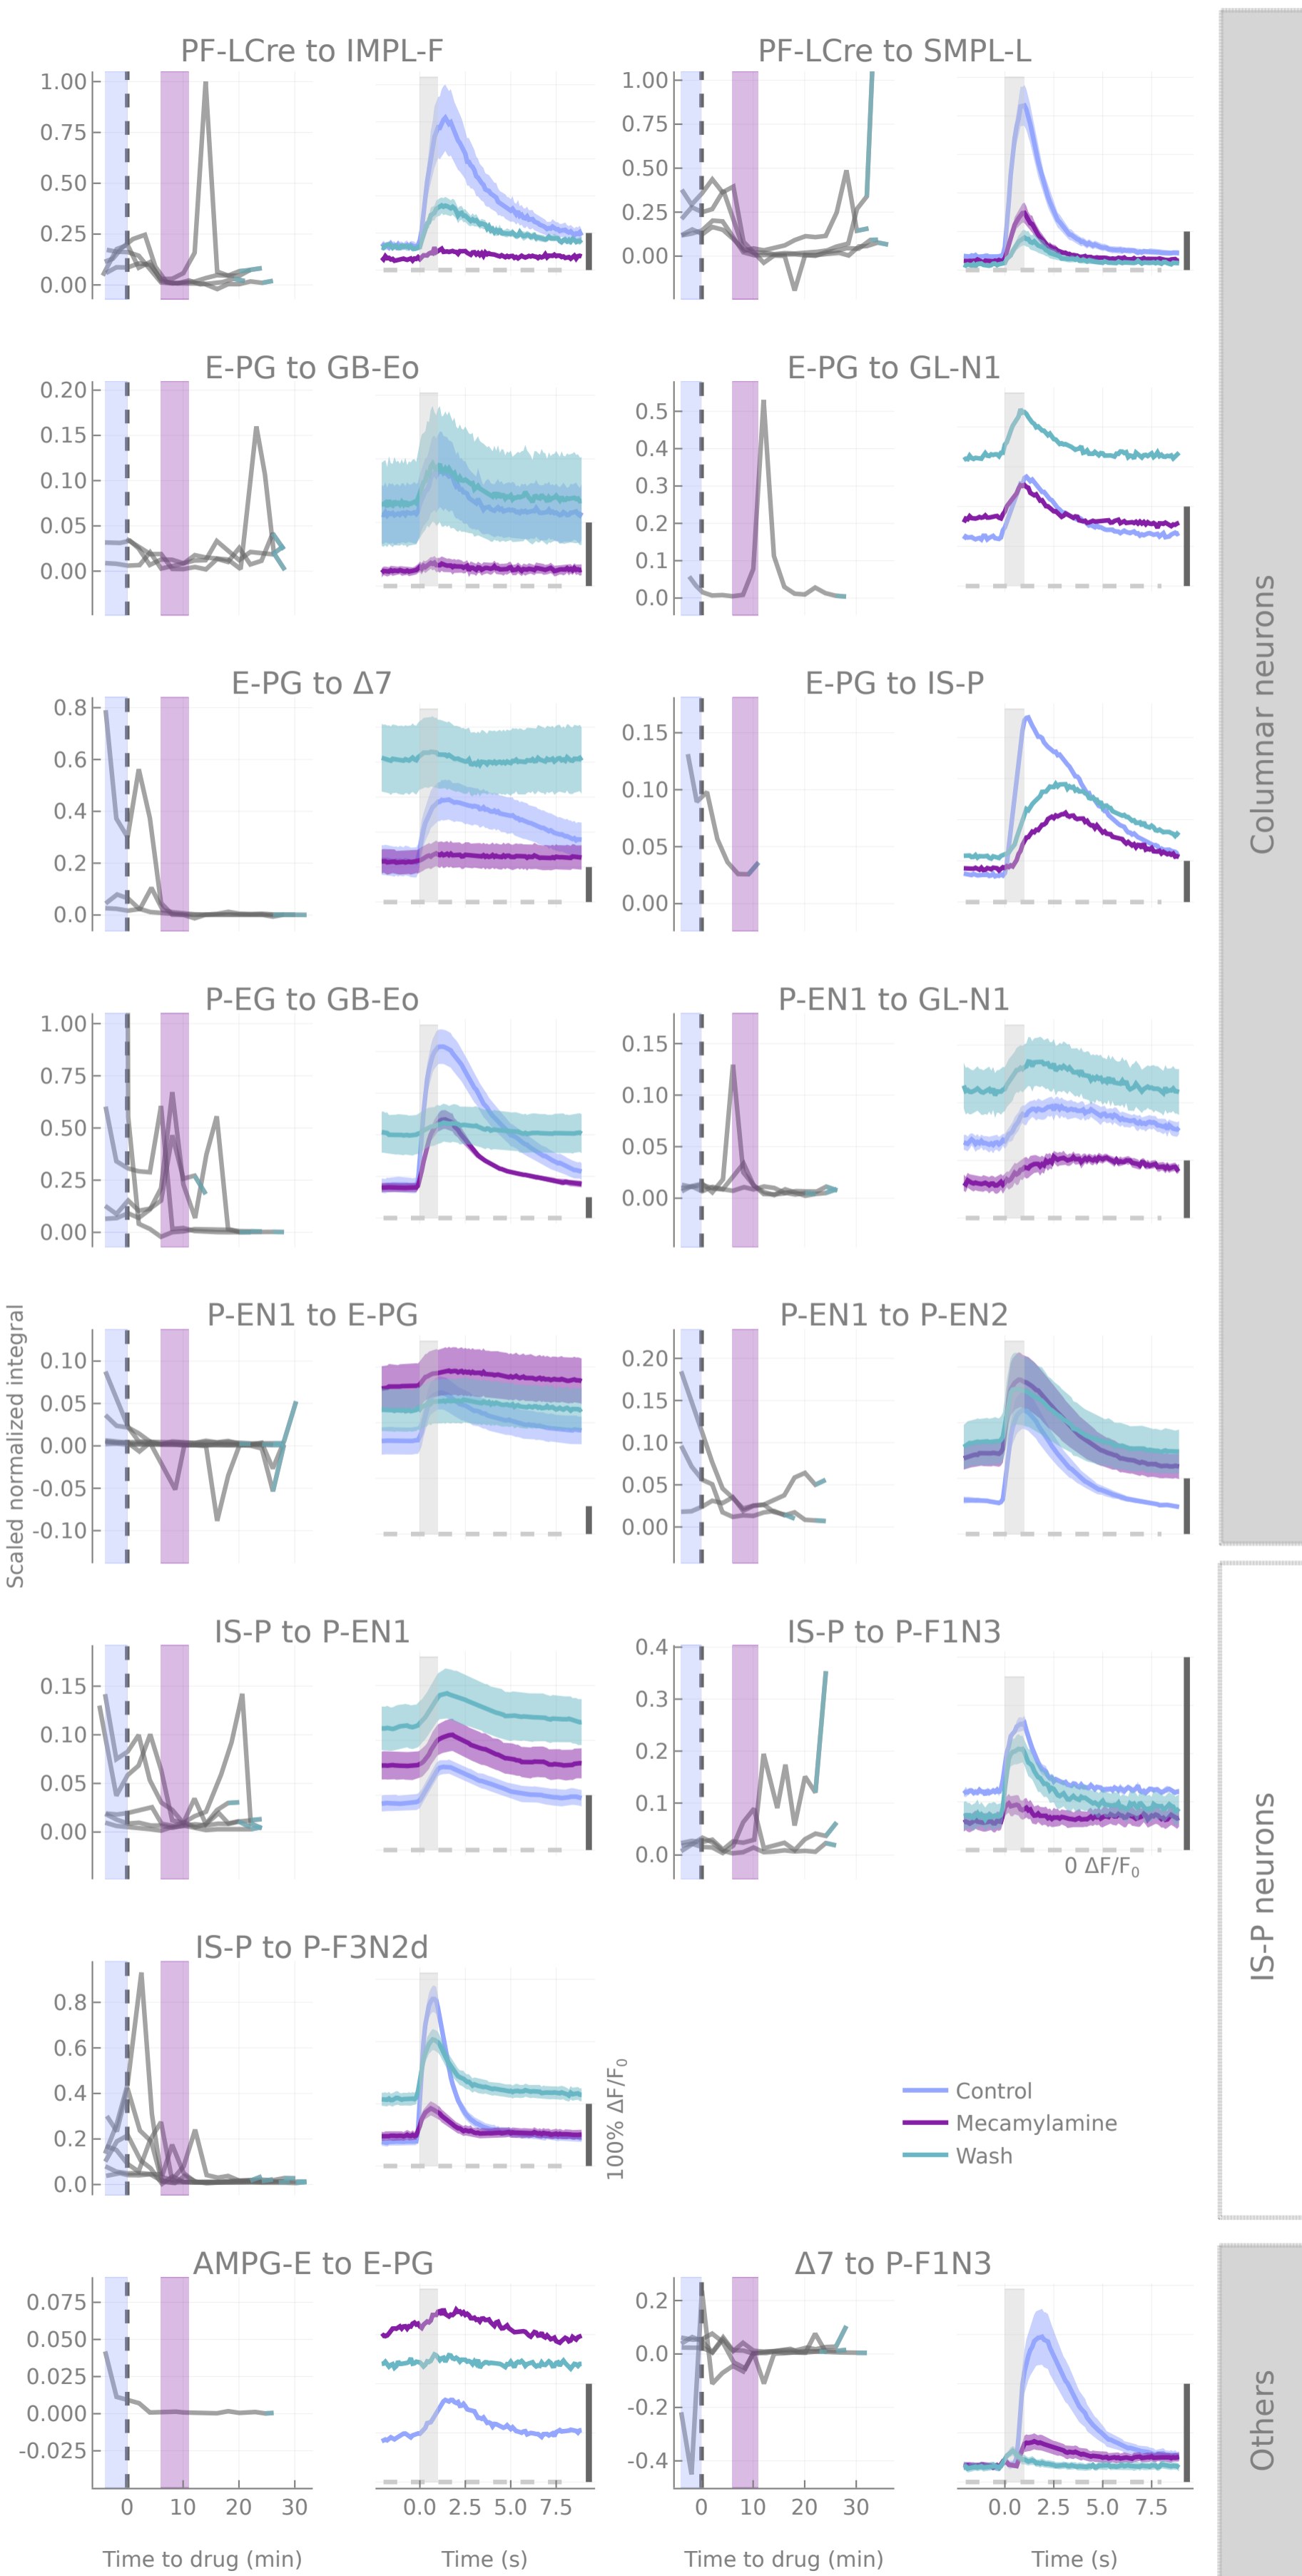

Supplement: supp [file elife-37017-supp-v1.zip › elife_poa_e37017_Figure_4_figure_supplement_2.pdf]

A

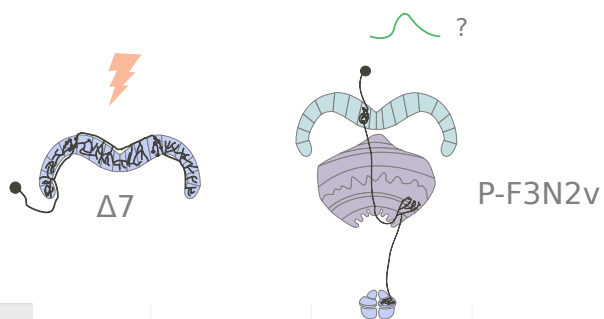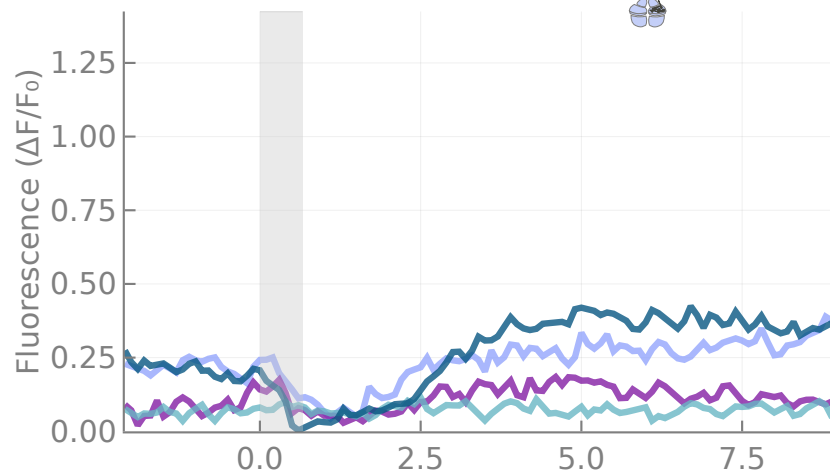

B

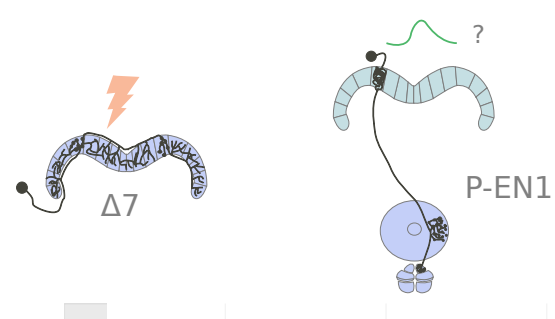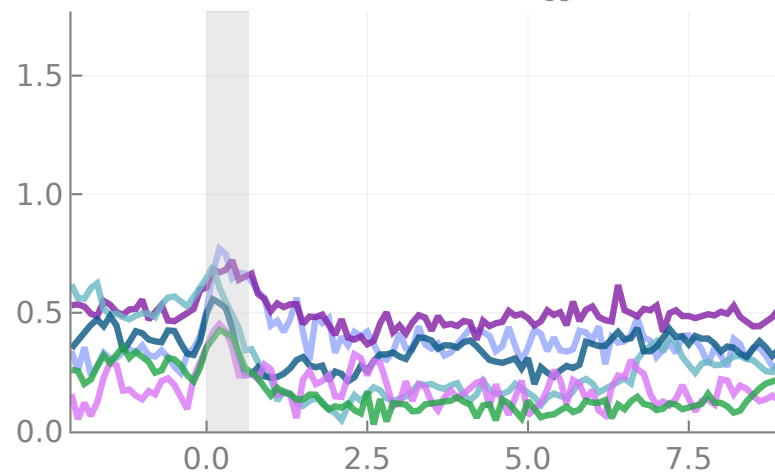

C i

ii

iii

iv

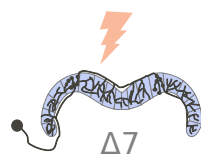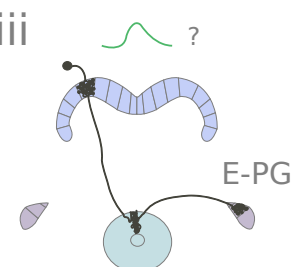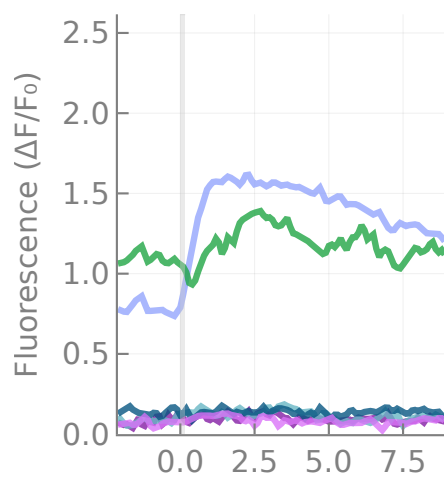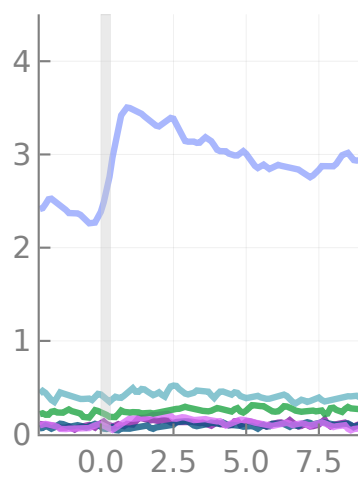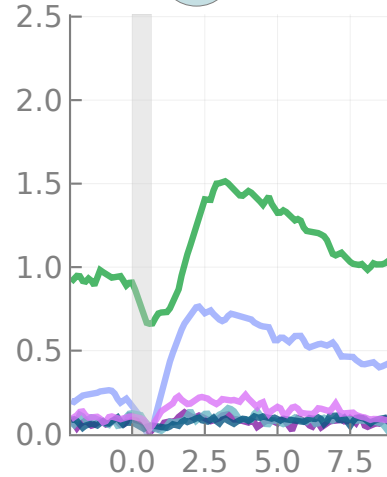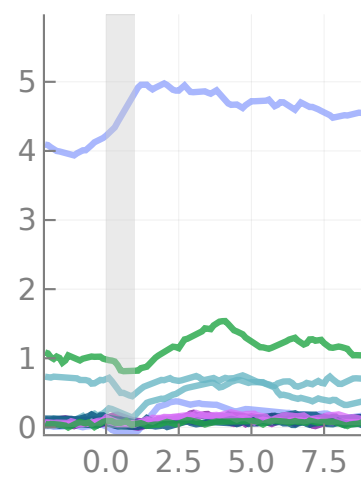

Time (s)

Supplement: supp [file elife-37017-supp-v1.zip › elife_poa_e37017_Figure_5_figure_supplement_1.pdf]

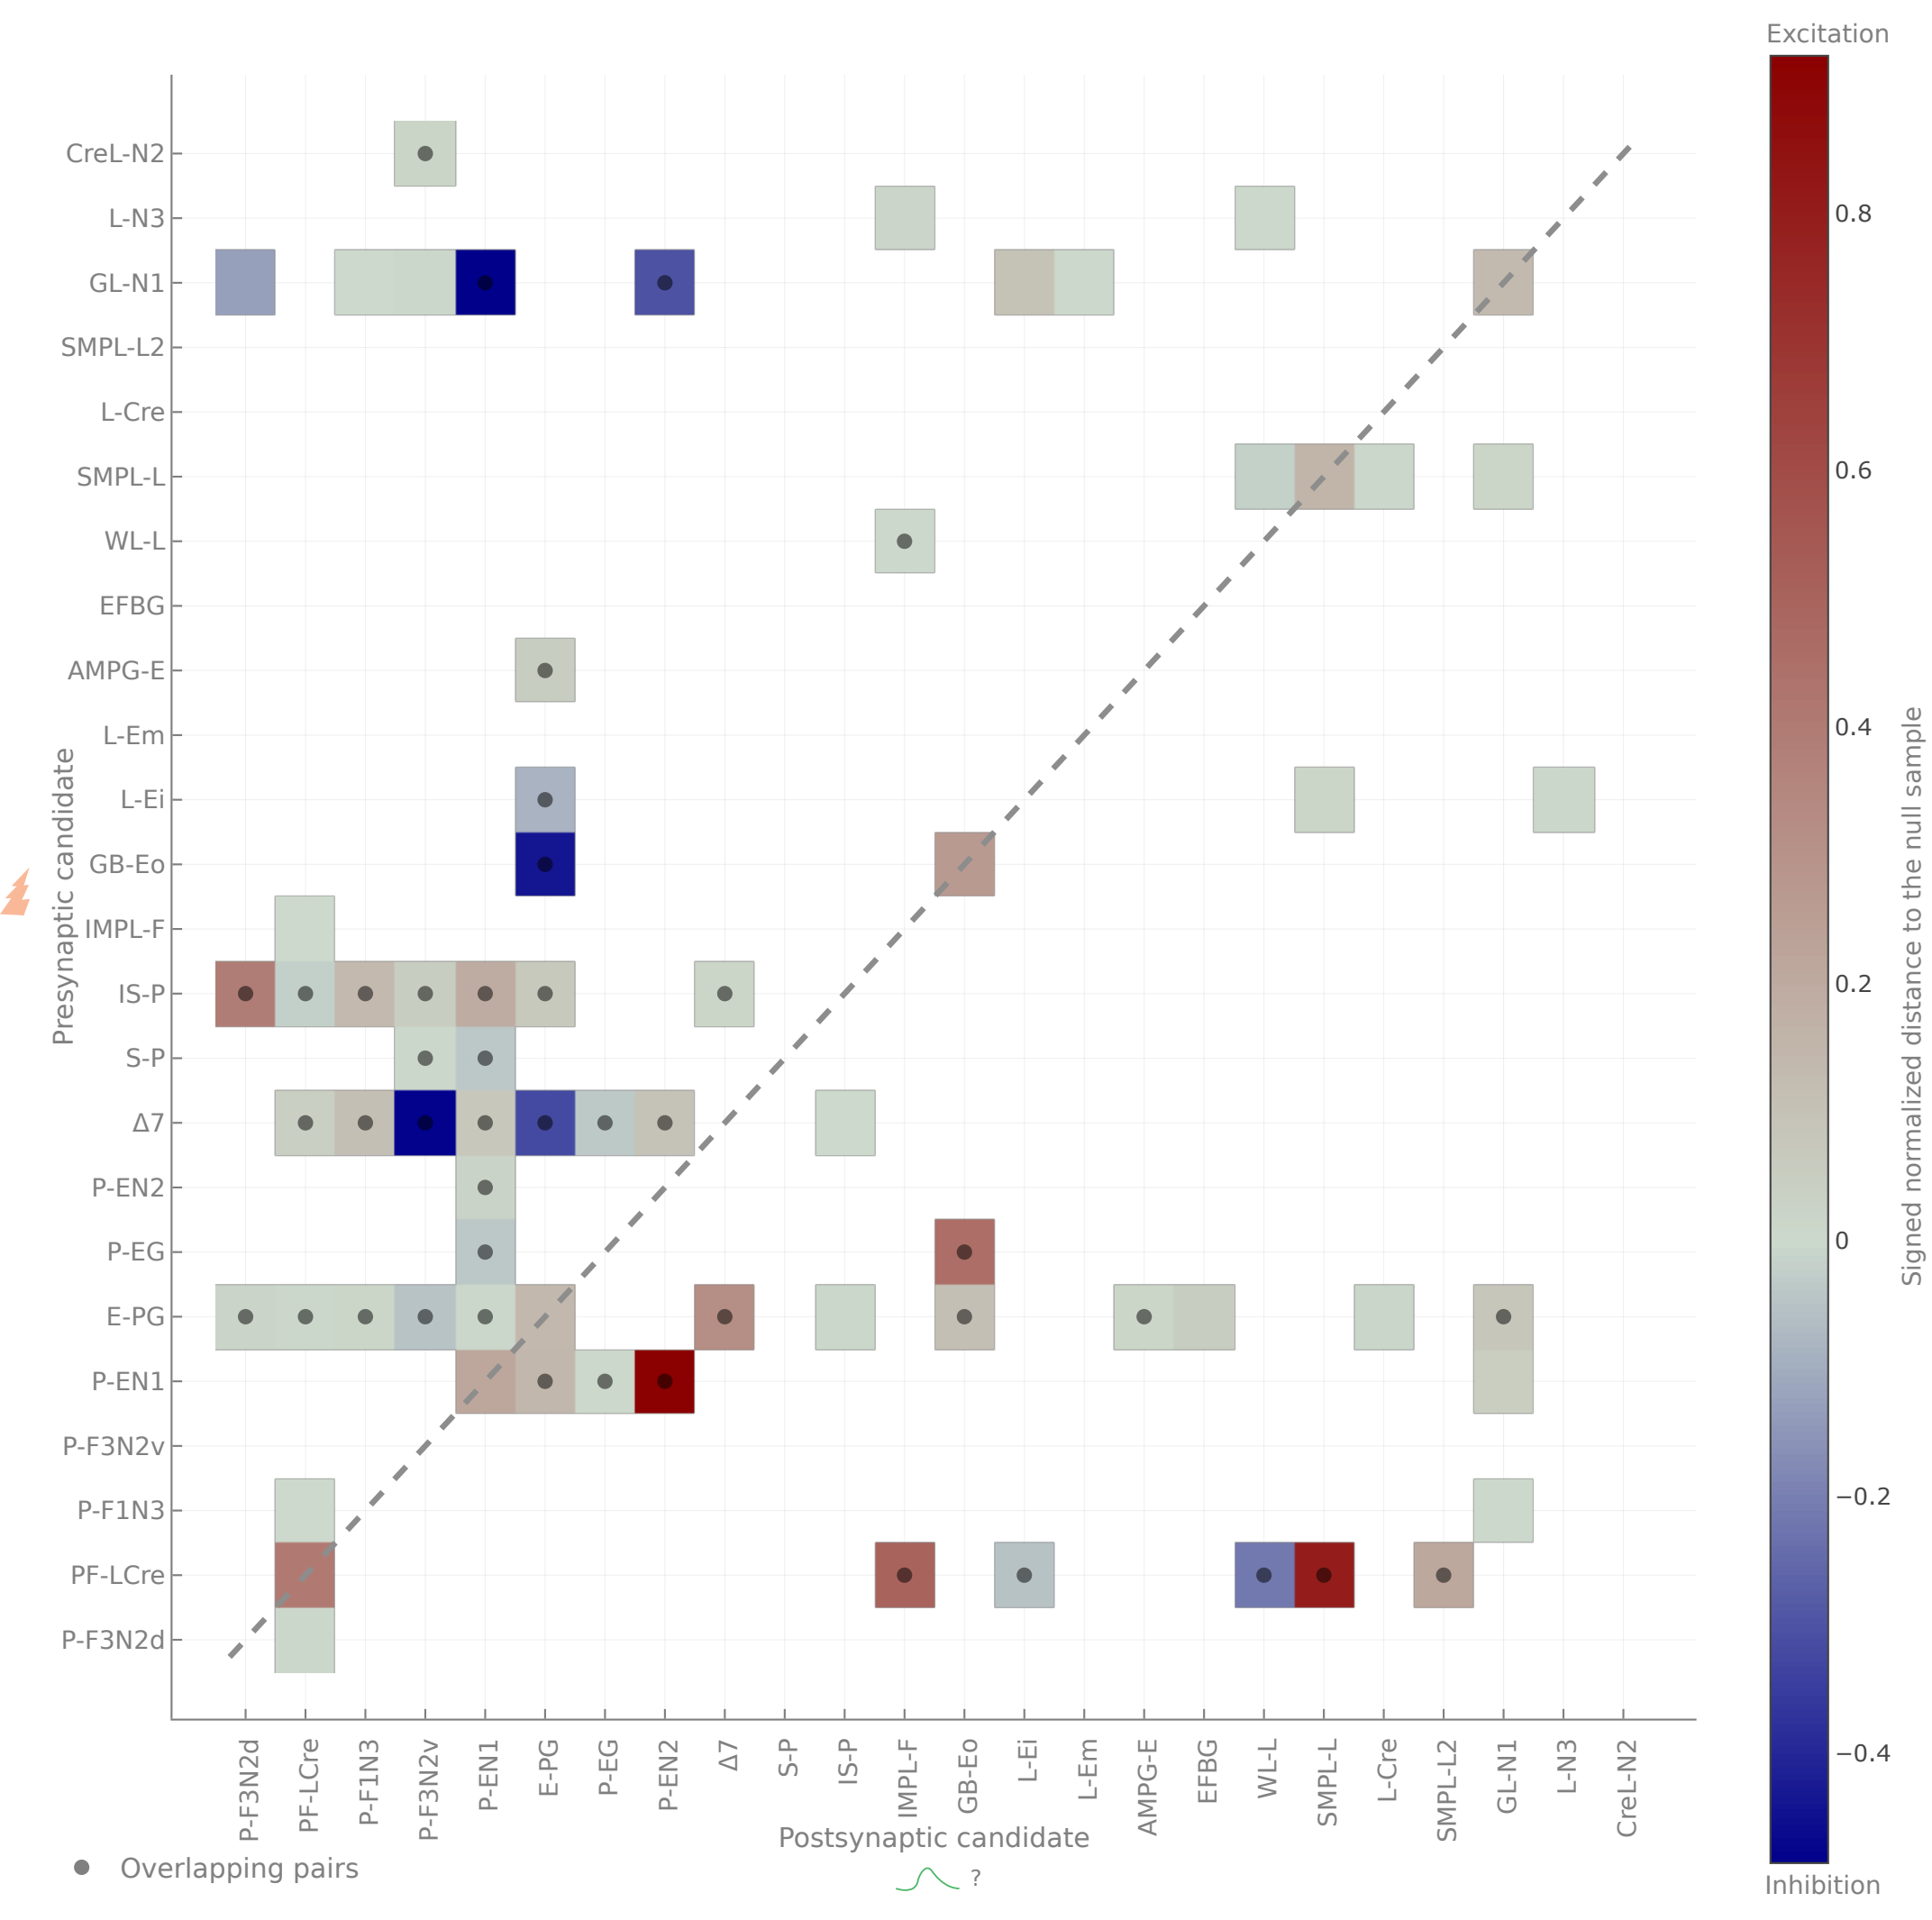

Supplement: supp [file elife-37017-supp-v1.zip › elife_poa_e37017_Figure_4_figure_supplement_1.pdf]

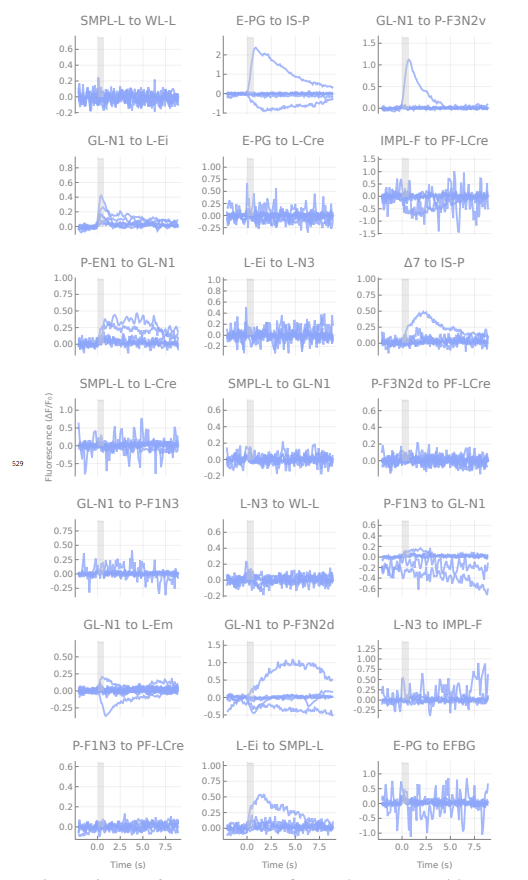

Supplement: supp [file elife-37017-supp-v1.zip › elife_poa_e37017_Figure_3_figure_supplement_1.png]

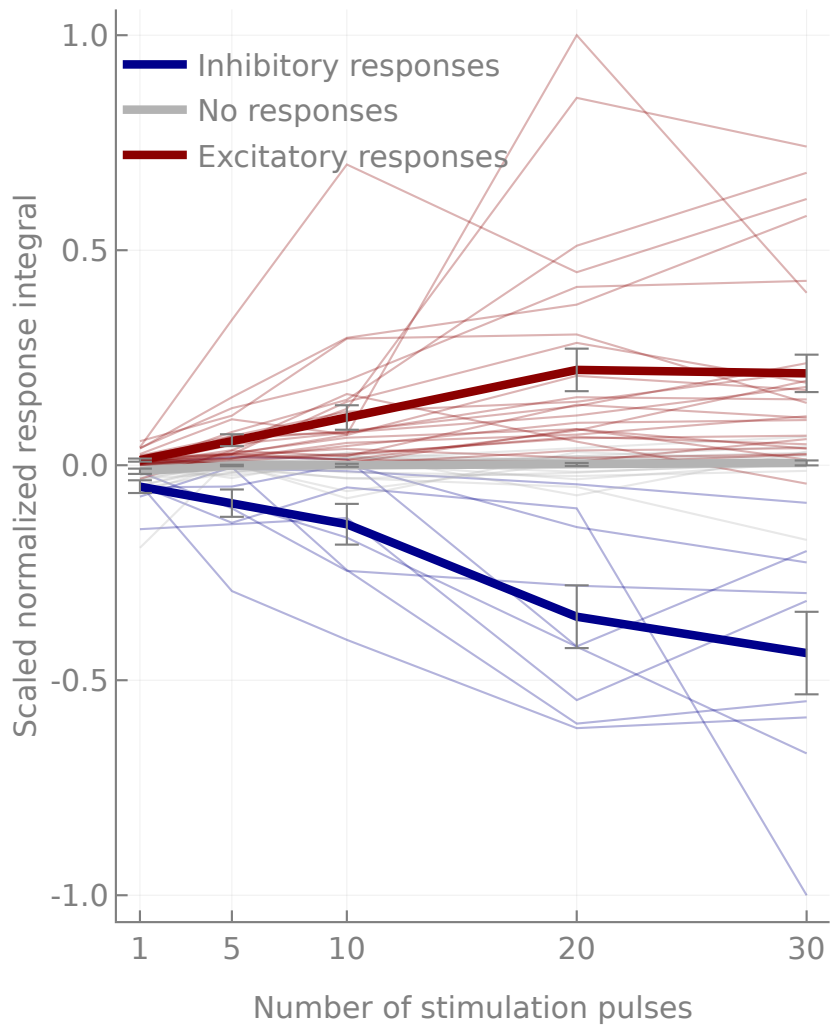

Supplement: supp [file elife-37017-supp-v1.zip › elife_poa_e37017_Figure_4_figure_supplement_4.pdf]

### E-PG to $\Delta 7$

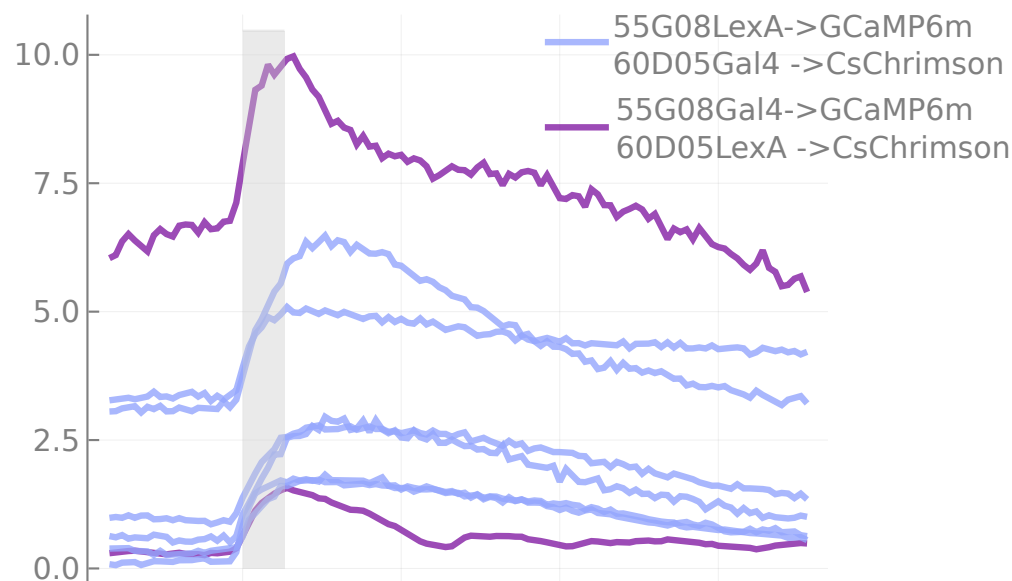

### GB-Eo to E-PG

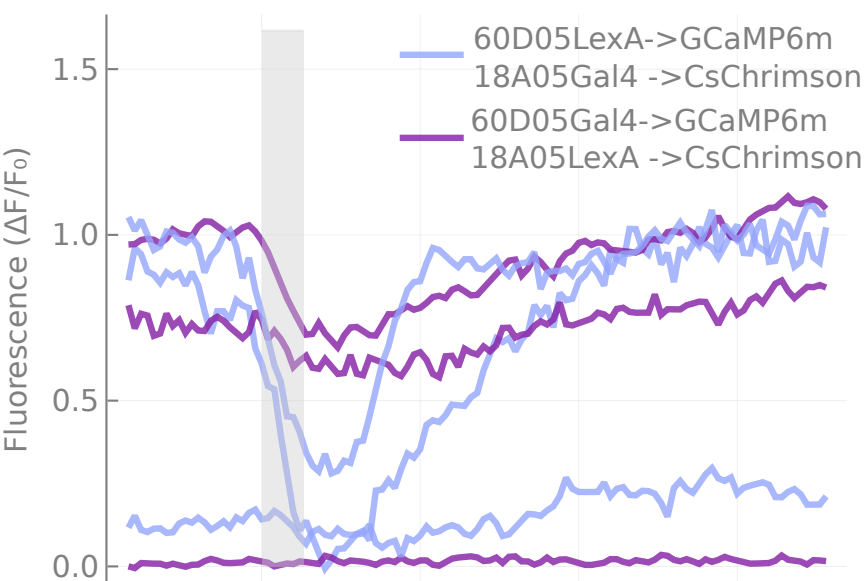

### $\Delta 7$ to P-EN2

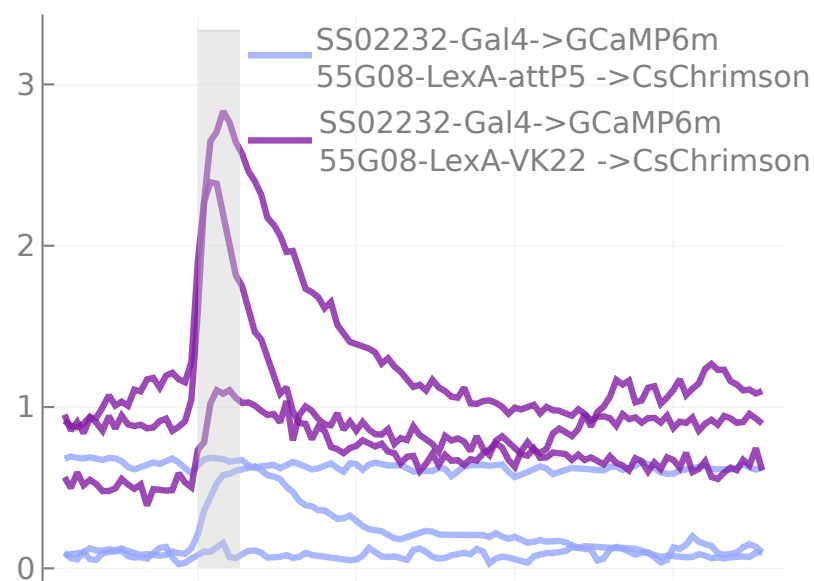

### E-PG to IS-P

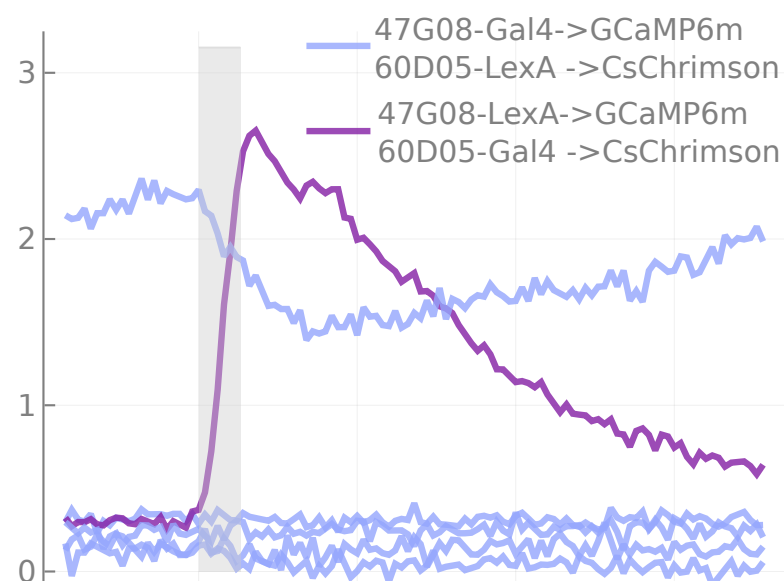

### GL-N1 to P-EN1

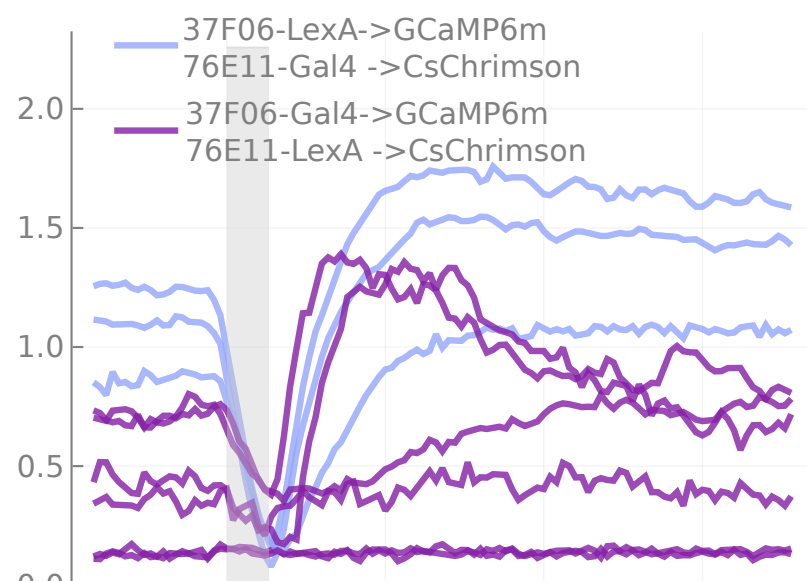

Time (s)

Time (s)

Supplement: supp [file elife-37017-supp-v1.zip › elife_poa_e37017_Figure_4_figure_supplement_5.pdf]

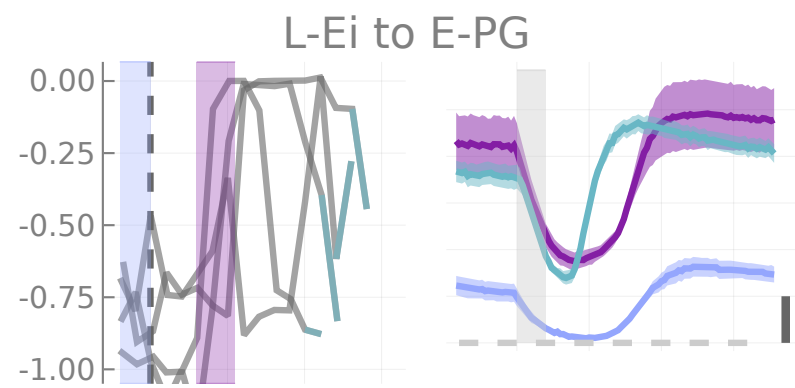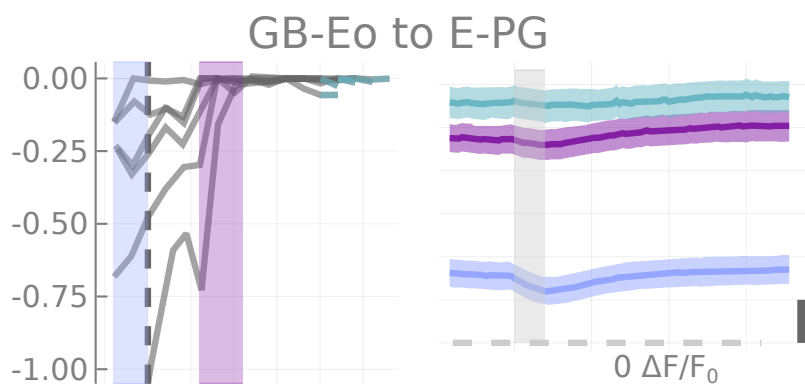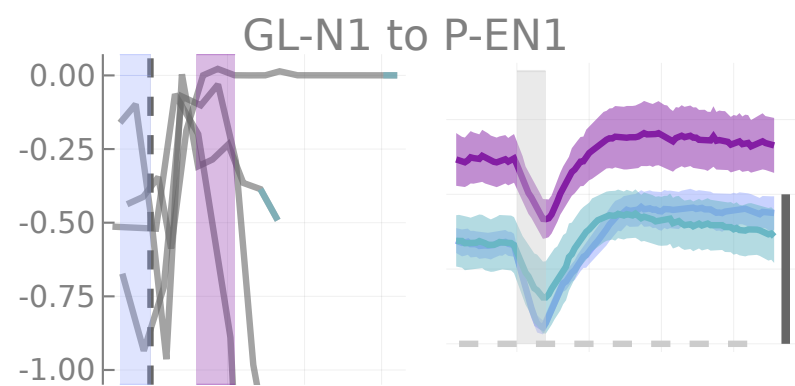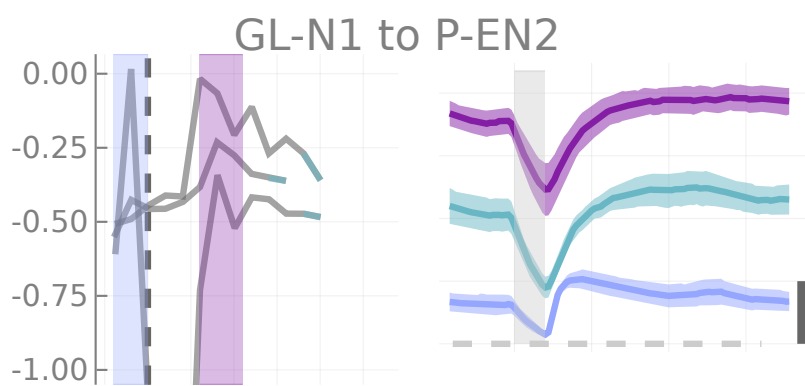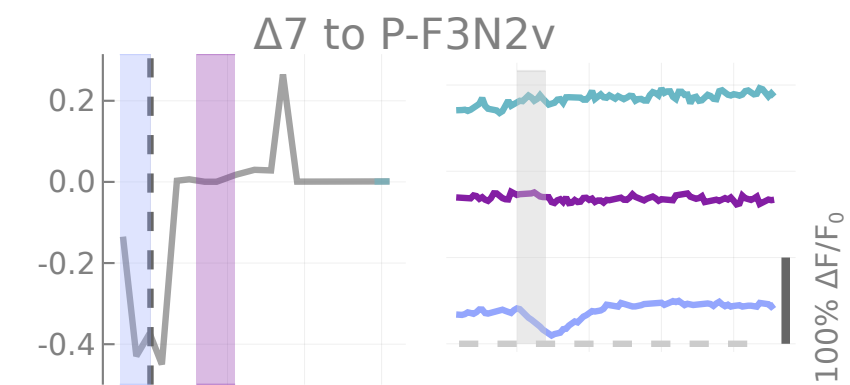

Control  
Picrotoxin  
Wash

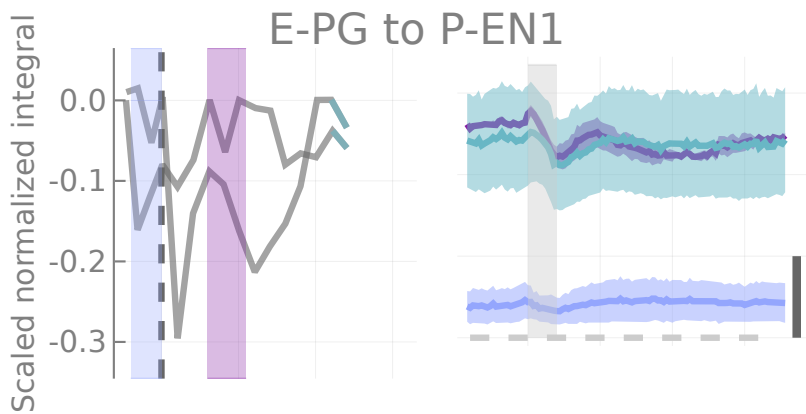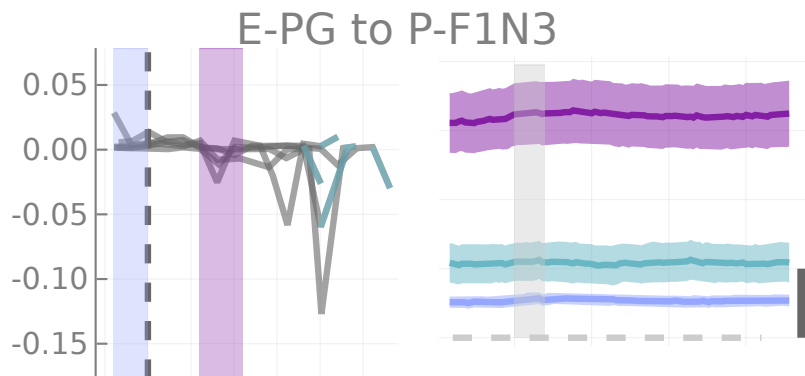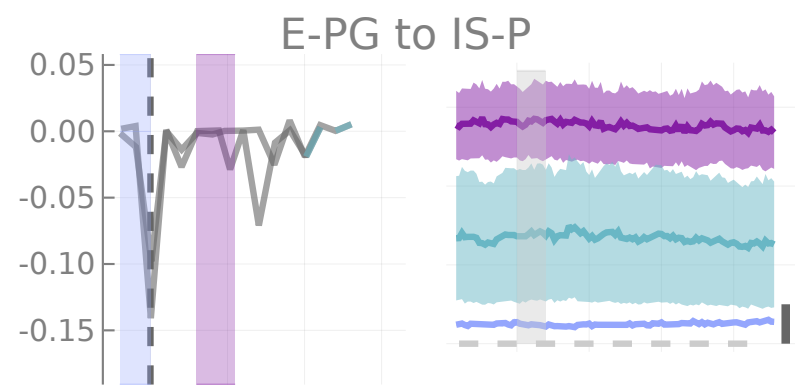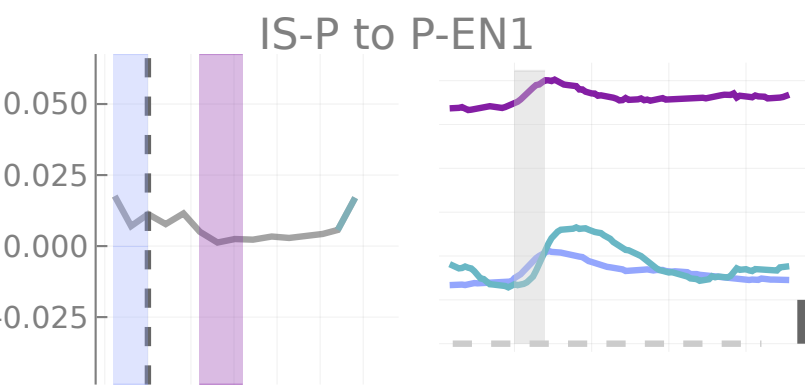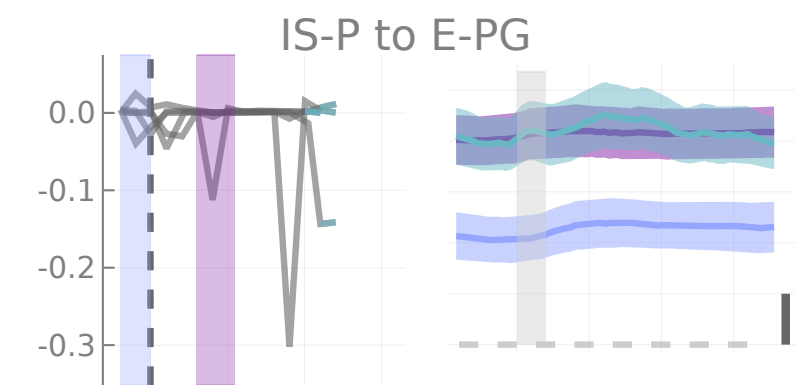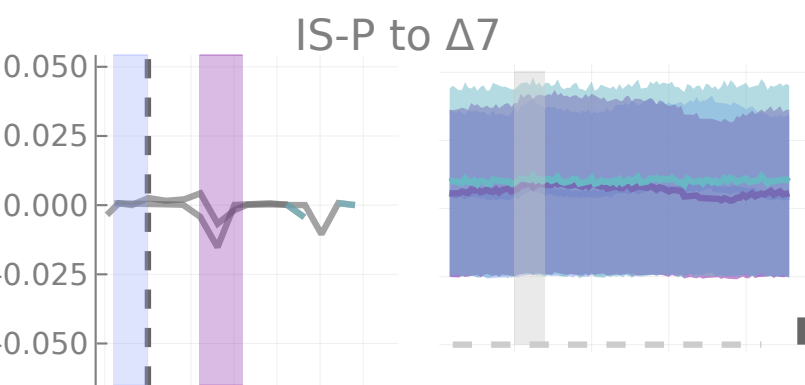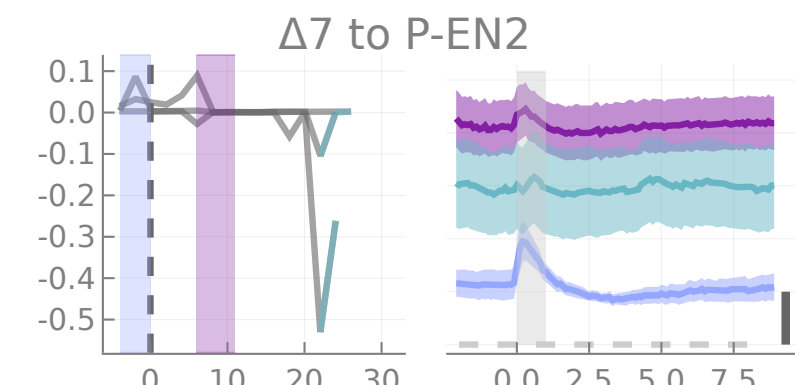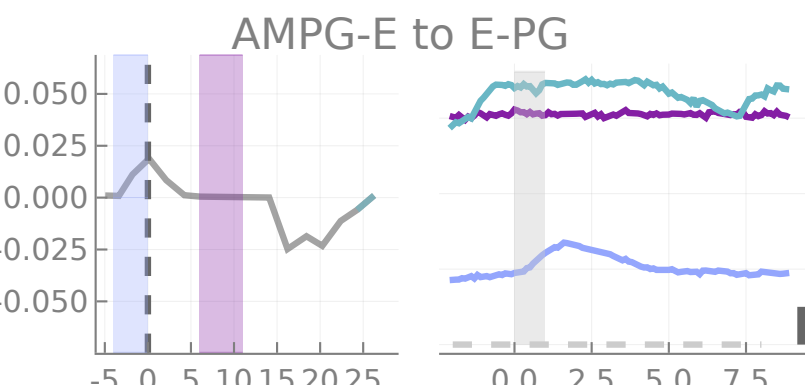

Inhibitory pairs

"unmasking" controls

Supplement: supp [file elife-37017-supp-v1.zip › elife_poa_e37017_Figure_4_figure_supplement_3.pdf]

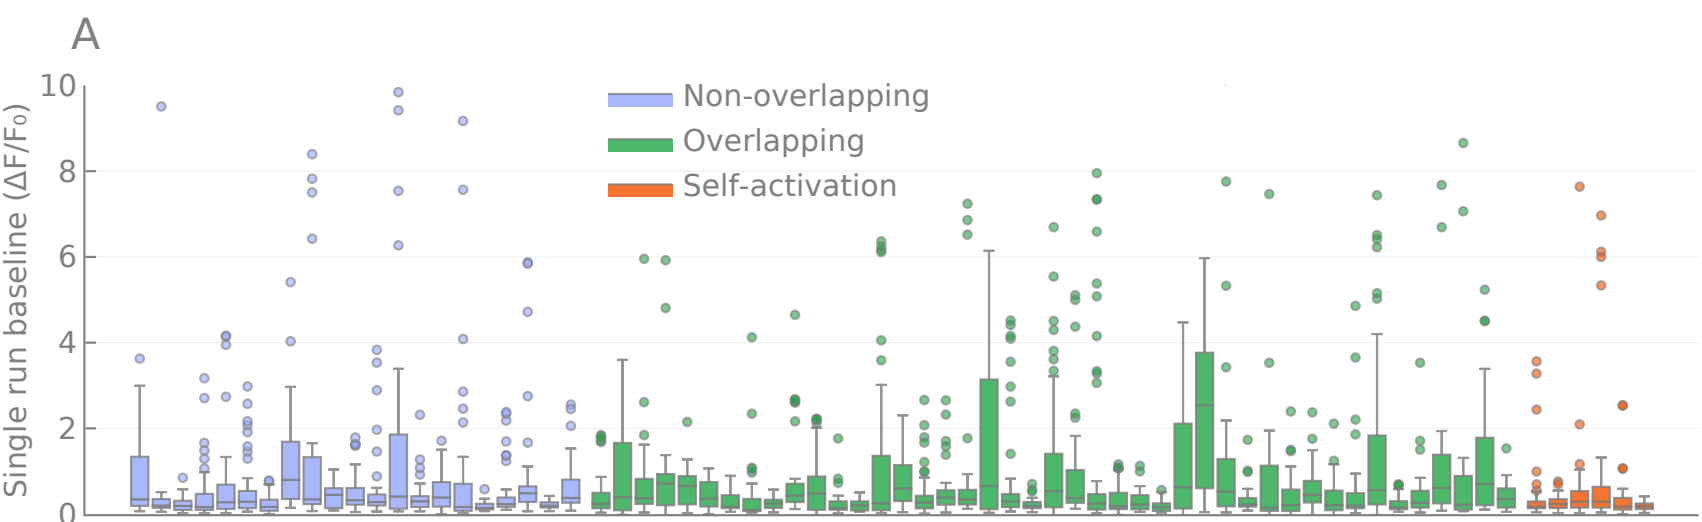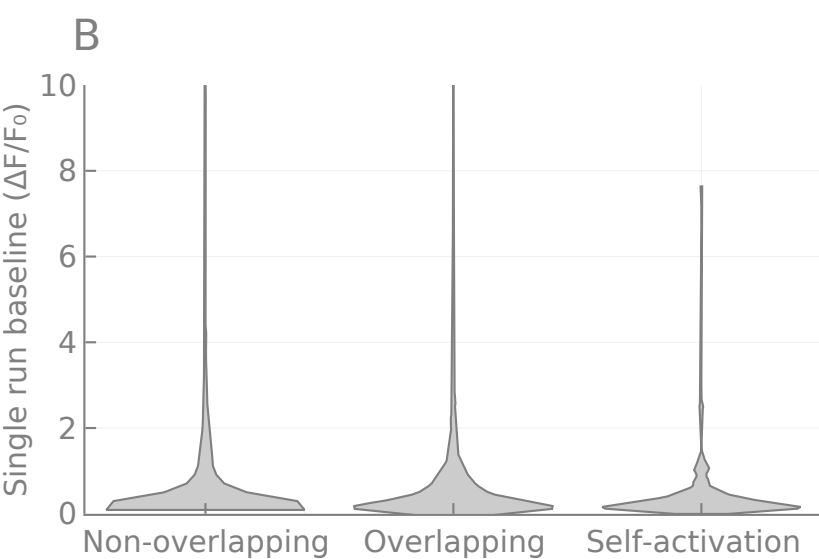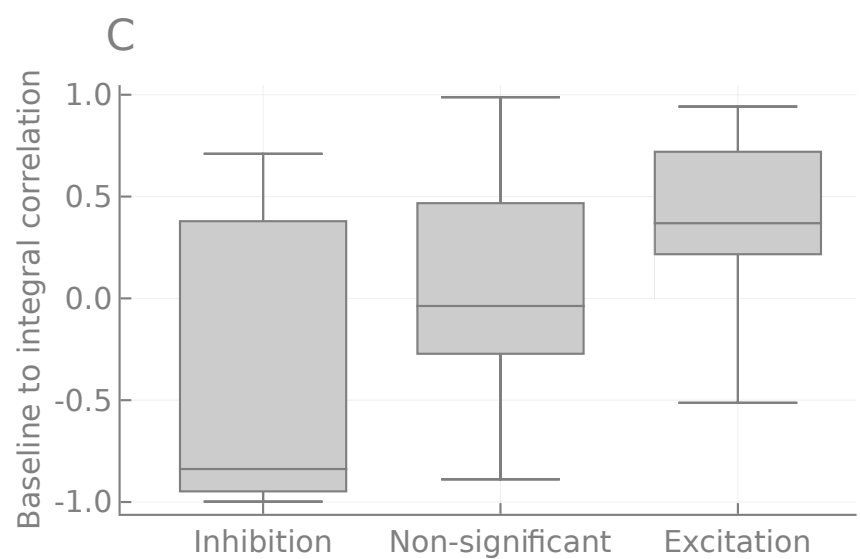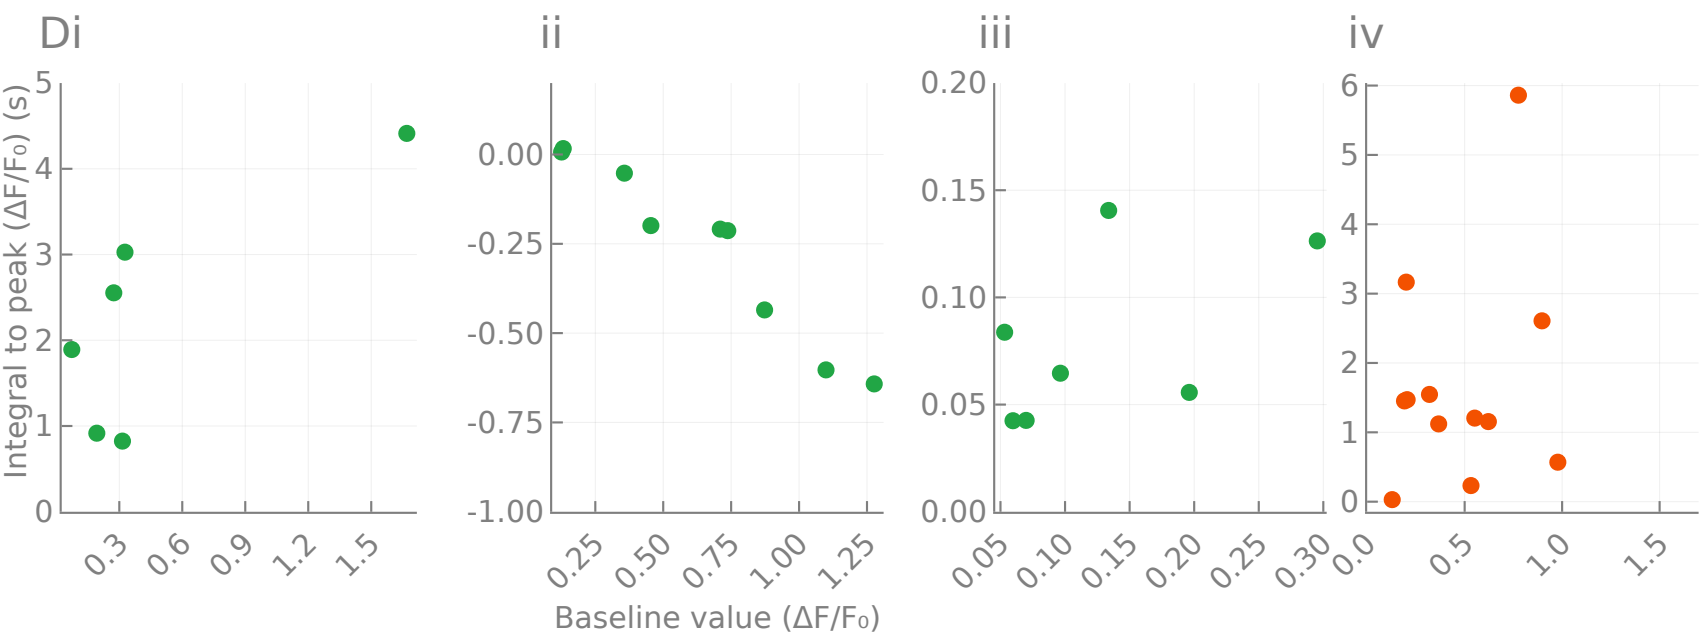

Supplement: supp [file elife-37017-supp-v1.zip › elife_poa_e37017_Figure_3_figure_supplement_4.pdf]
